1 **polyCluster: Defining Communities of Reconciled Cancer Subtypes with Biological and**  
2 **Prognostic Significance**

3 **Katherine Eason<sup>1</sup>, Gift Nyamunanda<sup>1,2</sup>, Anguraj Sadanandam<sup>1,2,\*</sup>**

4 <sup>1</sup> Division of Molecular Pathology, Institute of Cancer Research (ICR), London, United Kingdom

5 <sup>2</sup> Centre for Molecular Pathology, Royal Marsden Hospital (RMH), London, United Kingdom

6 \* To whom correspondence should be addressed

7 Anguraj Sadanandam, Ph.D.

8 Institute of Cancer Research (ICR)

9 15 Cotswold Road, Sutton, Surrey, SM2 5NG

10 United Kingdom

11 Anguraj.Sadanandam@icr.ac.uk

12

13 **Keywords:** Clustering methods, subtype community, reconciliation methods, network analysis,  
14 label propagation method, hypergeometric test, relative proportion of common samples, breast  
15 cancer, uveal melanoma, hierarchical clustering, k-means clustering, non-negative matrix  
16 factorization.

17

18

19

20

21

## 22 **Abstract**

23           To stratify cancer patients for most beneficial therapies, it is a priority to define robust  
24 molecular subtypes using clustering methods and “big data”. If each of these methods produces  
25 different numbers of clusters for the same data, it is difficult to achieve an optimal solution. Here,  
26 we introduce “polyCluster”, a tool that reconciles clusters identified by different methods into  
27 context-specific subtype “communities” using a hypergeometric test or a measure of relative  
28 proportion of common samples. The polycluster was tested using a breast cancer dataset, and latter  
29 using uveal melanoma datasets to identify novel subtype communities with significant metastasis-  
30 free prognostic differences. Available at: <https://github.com/syspremed/polyClustR>

31

32

33

34

35

36

37

38

39

## 40 **Background**

41           Recently, advances in omics technologies have lead to large volumes of data being collected  
42 on molecular profiles, including gene expression, in various cancers. Cancers of all types exhibit  
43 inter-tumoral (between patient) heterogeneity that can be quantified in part by gene expression. This  
44 heterogeneity can help explain the differential prognosis in cancer patients treated with the same  
45 therapies. A well-established example is the specific efficacy of trastuzumab (Herceptin) in HER2-  
46 positive breast cancer [1]. Previously, we have suggested potential differential cetuximab (anti-  
47 EGFR therapy) response in colorectal cancer (CRC) subtypes [2]. More recently, trials of  
48 oxaliplatin in Stage II and III CRC found that its effectiveness may be limited to certain subtypes  
49 published by us [2, 3]. In pancreatic cancer, we observed a relatively increased response to  
50 gemcitabine in quasi-mesenchymal (QM) subtype cell lines compared to classical subtype cell lines  
51 [4]. This result corroborates with the finding by Mofitt *et al.*, that patients from basal-like pancreatic  
52 cancer subtype (equivalent to our QM subtype) has improved response to adjuvant therapy compared  
53 to classical subtype pancreatic tumors [5]. Similarly, we showed potential subtype-specific  
54 therapies using a panel of breast cancer cell lines and drug response analysis [6]. Nevertheless, for  
55 accurate prediction of therapy responses, the challenge lies in defining robust and clinically relevant  
56 subtypes.

57

58 In breast cancer, where current opinion lies with the existence of 5 intrinsic gene expression  
59 subtypes (basal, HER2/ERBB2, luminal A, luminal B, and normal-like), studies have variously  
60 reported a number of subtypes ranging between 4 [7] and 10 [8]. While multiple factors are  
61 involved in this apparent discrepancy in defining a number of cancer subtypes, the clustering  
62 methodologies can also significantly contribute to this difference. There are various clustering  
63 algorithms that are regularly employed for this purpose, and each has its own strengths according to

64 the underlying structure of the data it is applied to. As clustering algorithms have a huge range of  
65 potential applications, selection of the appropriate algorithm to use in any given situation can be  
66 difficult. At the same time, the need for the user to inspect the results of each algorithm over a range  
67 of numbers of clusters ( $k$ ) and select the optimal solution are often subjective. This situation has  
68 been improved by the adoption of various consensus clustering techniques, which allow for visual  
69 and quantitative examination of multiple re-runs of the same algorithm so the effects of random  
70 starting points can be taken into consideration.

71 However, consensus clustering does not diminish the influence the choice of algorithm has  
72 on the clustering solution. The application of different consensus clustering algorithms leads to  
73 different number of subtypes (number of clusters,  $k$ ), and hence, defining the optimal number of  
74 clusters is often challenging. This is due to various factors in the design of the algorithm: whether it  
75 is ‘greedy’, that is, if it makes the locally optimal choice at each individual stage at the possible  
76 expense of finding a global optimum; whether cluster centroids must be located at data points; and  
77 how iterative algorithms evaluate their convergence to a solution are some examples [9]. This  
78 makes the use of a single algorithm to cluster gene expression profiles, as is often done in subtyping  
79 studies, risky. In addition, the clusters found may well be valid, but information about either larger  
80 stratification of the data or small but distinct sub-subtypes of low frequency may be lost [10]. It is  
81 for this reason that finding methods of reconciling optimal clustering solutions identified by  
82 different algorithms is necessary. Cluster reconciliation not only validates the clusters from  
83 different algorithms – it can also reveal in greater detail the structure in the data on the macro and  
84 the micro scale, from broad classifications resulting from a handful of important functional groups,  
85 to rarer and less well-defined sub-subtypes. It also reveals more about the efficacy of the clustering  
86 algorithms themselves [10, 11].

87 Here, we demonstrate how to identify optimal solutions and define subtype “communities”  
88 by reconciling clusters identified from three different consensus clustering methods - hierarchical

89 clustering (HC) [12, 13], k-means (KM) [14], and non-negative matrix factorization (NMF) [15].  
90 The clusters were further reconciled using at least two approaches. The first, a hypergeometric test  
91 to determine the probability that two clusters share the same samples by chance, was previously  
92 used to successfully reconcile subtypes of CRC found via clustering in two studies which found  
93 three and five optimal subtypes, respectively [2, 10, 16]. It was determined via this analysis that the  
94 three subtypes could be appropriately divided into the five sub-subtypes. When four further studies  
95 into CRC were published, finding between 3 and 6 optimal clusters [17-20], the Jaccard index was  
96 applied to help understand the relationships between these solutions and find “consensus molecular  
97 subtypes” (CMS) [11]. The second and a new reconciliation measure used here – calculating the  
98 relative proportion of samples in a smaller cluster present in a larger one (termed Eason-  
99 Sadanandam index) – differs from measures of cluster similarity such as the Jaccard index in order  
100 to give sub-subtypes a high score, even if they are much smaller than a larger cluster (see **Methods**  
101 section).

102 All the above reconciliation methods are part of our new framework or package called  
103 “polyCluster”. The framework is flexible that other methods can be included any time. Here, we  
104 demonstrate how our new framework can be used to identify breast cancer gene expression  
105 “subtype communities” and to compare with existing intrinsic subtypes [7]. Moreover, we have  
106 applied this to uveal melanoma gene expression profiles to define novel gene expression “subtype  
107 communities” with different prognosis and chromosomal aberrations associated with them.

108

109

110

111

112

113

114

## 115 **Results and Discussion**

116 Our reconciliation method (**Figure 1**) uses a matrix of preprocessed and normalized gene  
117 expression (or any other similar data) and performs the following: a) applies different consensus  
118 clustering methods (including NMF, HC and KM) and uses statistical scores (specific to each  
119 method described below) for each clustering to determine the optimal number of clusters; and b)  
120 reconciles the results from different clustering methods and identifies a consensus solution by  
121 creating network of clusters that defines communities of integrated subtypes using methods such as  
122 the hypergeometric test and proportion of maximum intersection (PMI). We then identify the  
123 optimal “community” with highest average silhouette width [21] and compare this reconciliation to  
124 known subtypes, if they exist, for that set of samples. To illustrate this, we used published gene  
125 expression profiles from breast cancer and uveal melanoma as examples.

126

### 127 **Application to reconcile breast cancer “subtype communities” with intrinsic subtypes**

#### 128 *Breast cancer subtypes defined by multiple clustering methods*

129 For this purpose, we used breast tumor gene expression data ( $n = 118$ ) from a published  
130 study [22]. Details of initial clustering of this dataset and selection of  $k$  clusters for each algorithm  
131 are provided in **Figures S1A-C**. Initially, we applied the NMF to the 2258 most highly variable  
132 genes from this Chin data set as selected by standard deviation ( $SD > 0.8$ ). We identified highest  
133 cophenetic correlation coefficient of 0.9997 at  $k$  subtypes for NMF  $k_{NMF}=2$  followed by 0.9962 at  
134  $k_{NMF}=6$ . Silhouette width also showed peaks at  $k_{NMF}$  at 2 and 6 (**Figures S1 A-C**). In order to  
135 capture the most heterogeneity, we chose  $k_{NMF}=6$ , and named the clusters breast cancer (b)NMF1 to  
136 6. Overall, known subtypes of these samples [22] were significantly associated with these clusters  
137 (Fisher’s exact test;  $p < 0.001$ ). Specifically, the clusters bNMF1, bNMF3 and bNMF4 were  
138 significantly associated with luminal A, basal and luminal B, respectively (hypergeometric test;  
139 false discovery rate;  $FDR < 0.01$ ) (**Figure 2A**). The basal subtype was also border-line significantly

140 associated ( $FDR=0.2$ ) with bNMF5, suggesting the existence of a sub-subtype of basal breast  
141 cancer that was not identified earlier when subtypes for this dataset were predicted by correlation  
142 with intrinsic subtype signatures [23] [7]. bNMF2 and bNMF6 were not significantly associated  
143 with any of the published subtypes. Gene set enrichment analysis (GSEA) of these unidentified  
144 subtypes revealed associations with metaplastic breast cancer (bNMF2,  $FDR<0.01$ ) and with  
145 17q21-q25 amplicon gene sets (bNMF6,  $FDR < 0.1$ ) (**Figure S2A-B**). Overall, application of NMF  
146 to the Chin data set identified clusters that partially overlapped with published subtypes, and others  
147 with interesting breast cancer biology.

148

149 Since NMF identified extra subtypes in Chin data set, we applied two additional clustering methods  
150 – consensus hierarchical clustering (HC) and K-means (KM). When we applied consensus  
151 hierarchical clustering to the same data,  $k_{HC}=2$  and  $k_{HC}=6$  had the highest silhouette widths.  
152 (**Figures S1A and C**). The cophenetic coefficient after  $k_{HC}=6$  does not increase significantly and  
153 the consensus plot showed consensus clusters (**Figures S1A and C**). Hence, we chose six HC  
154 clusters to again cover the most heterogeneity. The clusters from HC for breast cancer data were  
155 defined as breast cancer (b)HC. As with the NMF clusters, these clusters were significantly  
156 associated with the known subtypes of these samples (Fisher's exact test;  $FDR<0.001$ ). The bHC1,  
157 bHC3 and bHC6 clusters were significantly (hypergeometric test;  $FDR<0.01$ ) associated with basal,  
158 luminal A and normal-like subtypes, respectively (**Figure 2B**). Both bHC2 and bHC5 were  
159 significantly ( $FDR<0.01$ ) associated with luminal B. bHC4 was marginally significantly associated  
160 with luminal A subtype, and bHC5 with the ERBB2 (HER2) subtype, with less significance  
161 ( $FDR<0.2$ ; **Figure 2B**).

162

163 Additionally, we applied consensus KM clustering to the Chin data set. While both the  
164 cophenetic coefficient and silhouette width showed highest peaks at  $k_{KM}=3$  and 4 (after  $k_{KM}=2$ ), we

165 observed that consensus clustering at these  $k_{KM}$ s did not show clear consensus clusters. There were  
166 not large differences in cophenetic coefficient, silhouette width and consensus clusters at  $k_{KM}$   
167 between 4 and 7 (**Figure S1A and D**). Hence, we chose  $k_{KM}=7$  as an optimal cluster. All of these  
168 KM clusters (defined as breast cancer (b)KM) were significantly associated with known breast  
169 cancer subtypes (**Figure 2C**; Fisher's exact test;  $p < 0.001$ ), unlike the NMF and HC clusters.  
170 Specifically, bKM1 and bKM4 were associated with basal, bKM2 with luminal B and bKM3,  
171 bKM5 and bKM6 with luminal A (hypergeometric test;  $FDR < 0.01$ ). bKM7 was significantly  
172 associated with the ERBB2 subtype, which was not highly significant with any NMF or HC  
173 clusters. bKM3 was marginally associated with the normal-like subtype ( $FDR=0.08$ ). Direct  
174 comparison of the two basal clusters through GSEA revealed enrichment of multiple gene sets  
175 associated with invasive breast cancer, immunity and cytokines (**Figure S2C-F**). This clearly  
176 suggests that different clustering algorithms have the inherent capacity to identify distinct clusters.  
177 Here, KM has identified clusters with more significant association to published subtypes.

178

### 179 *Identification of breast cancer "subtype communities"*

180 The existence of multiple clustering solutions defined by different algorithms poses the  
181 question of what number of clusters is optimal, and how they reconcile between different methods.  
182 To address these questions, we chose two different reconciliation methods – hypergeometric test  
183 and proportion of maximum intersection. The results from each of the reconciliation methods are  
184 discussed below.

185

186 Previously, we have used the hypergeometric test to assess enrichment of samples between  
187 two CRC classifications (including ours) as a means of reconciling subtypes [10]. Similarly, we  
188 have used this analysis here to reconcile breast cancer clusters between the three different (NMF,  
189 HC and KM) algorithms utilized above. Subsequently, in order to group those clusters with



190 significant similarity into “subtype communities” , we performed network community detection by  
191 applying weighted label propagation method (using FDR values as edge weights) [24]. As a result,  
192 we observed six “subtype communities” (groups of clusters; bHYP1-6) based on this analysis  
193 (**Figure 3A**).

194

195 There was significant association with the known subtypes and these communities (Fisher’s  
196 exact test;  $p < 0.001$ ). We observed that five communities were primarily and significantly  
197 (hypergeometric test;  $FDR < 0.05$ ) associated with published breast cancer subtypes – bHYP3 and  
198 bHYP4 with luminal A, bHYP2 with luminal B and bHYP1 and bHYP6 with basal (**Figures 3A**  
199 **and S3A**). Four of the communities (bHYP1-4) contained clusters from all three clustering  
200 algorithms (**Figure 3A**). Interestingly, each of the luminal A and basal subtypes were split into two  
201 communities. One basal community (bHYP6) contained the immune-enriched bKM4 cluster. One  
202 of the luminal A communities (bHYP3) contained a number of samples from the ERBB2 subtype in  
203 a cluster that was enriched for a metaplastic breast cancer signature (bNMF2; **Figures 3A** and  
204 **S3A**), while the other (bHYP4) contained some luminal B samples in the 17q21-q25 amplicon-  
205 enriched cluster (bNMF6; **Figures 3A** and **S3A**). Finally, there was a community (bHYP5) with  
206 mixture of normal-like and ERBB2 subtype samples. This community was the most mixed in terms  
207 of intrinsic subtypes. Overall, hypergeometric test-based reconciliation expanded the breast cancer  
208 subtypes to 6 communities.

209

210 Our PMI method is similar to the Jaccard analysis that we used recently to reconcile CRC  
211 subtypes as a part of the CRC Subtyping Consortium (CRCSC) [11], with the difference that it  
212 weights sub-groups of a larger cluster as strongly as identical clusters of the same size (see  
213 **Methods**). Here, we applied the PMI method to reconcile subtypes from NMF, HC and KM similar  
214 to what we performed using the hypergeometric test. Unlike the hypergeometric method, PMI

215 identified five communities (bPMI1 to 5; **Figures 3B and S3B**), four (bPMI2 to 5) of which were  
216 analogous to hypergeometric communities (bHYP2, 3, 4 and 5). The final community (bPMI1) was  
217 a combination of the two basal hypergeometric communities (bHYP1 and 6). These communities  
218 were significantly associated with known subtypes, overall (Fisher's exact test;  $p < 0.001$ ). As  
219 expected, four of the five communities represent luminal A (bPMI3 and 4), luminal B (bPMI2) and  
220 basal (bPMI1) communities (hypergeometric;  $FDR < 0.05$ ). The other community (bPMI5) was a  
221 mixture of HER2/ERBB2 and normal-like (**Figures 3B and S3C**).

222

223 To chose optimal “subtype community” between HYP and PMI communities, we calculated  
224 the silhouette width [21] for all samples in the different communities (**Figures 3 and S4**). The  
225 average silhouette widths for HYP communities were 0.06 and that for PMI communities were  
226 0.07. Hence, PMI communities with highest average silhouette width were chosen as optimal.

227

228 This application of the pipeline to a well-characterised cancer has demonstrated its ability to  
229 identify new biologically distinct “subtype communities” of patients, alongside those subtypes  
230 which have already been extensively described. We next sought to apply this pipeline to a cancer  
231 with molecular subtypes that have not been explored so comprehensively, although uveal melanoma  
232 classes at gene expression levels are known [25-27].

233

## 234 **Application to uveal melanoma and identification of novel “subtype communities”**

### 235 *Identification of subtype communities*

236 Compared to breast cancer, uveal melanoma is a cancer type that has not been extensively  
237 subtyped, presumably due to its low incidence. This scarcity of samples makes clustering a  
238 challenge – clusters discovered are less likely to be robust due to their small size. It is in cases such

239 as this where the reconciliation of clusters from multiple algorithms may present benefits in terms  
240 of increasing confidence in the results of clustering.

241

242 As with the breast cancer data, we applied the three clustering algorithms of HC, KM and  
243 NMF to a dataset of the 6146 most variable genes ( $SD > 0.8$ ) from 58 patients with uveal melanoma  
244 (GSE22138, [28]). By performing the same assessment of cophenetic coefficient, silhouette width  
245 and consensus matrices, we discovered four clusters by HC, six clusters by KM and five clusters by  
246 NMF (**Figure S5A-D**). This demonstrates that different clustering methods yield different clusters  
247 using the same data set. However, reconciling the results from these methods to identify the optimal  
248 number of clusters can characterize the more heterogeneity in uveal melanoma that may be  
249 associated with disease phenotypes such as metastasis and abnormalities in chromosome 3.

250

251 By reconciling these subtypes by a hypergeometric test followed by community detection,  
252 we identified five “subtype communities” of clusters (**Figure 4A**). When we assessed these  
253 communities for the key molecular feature of chromosome 3 aneuploidy, we discovered a  
254 significant association of these communities with this feature (Fisher’s exact test;  $p < 0.001$ ); one  
255 community – melanoma mHYP2 – was significantly enriched (hypergeometric test;  $FDR < 0.001$ )  
256 for monosomy, and another (mHYP5) was significantly enriched ( $FDR < 0.05$ ) for both disomy and  
257 partial monosomy (**Figures 4A** and **S6A**). Two of the remaining three communities showed less  
258 significant associations with chromosome 3 disomy (mHYP4) and monosomy (mHYP1;  
259 hypergeometric test;  $FDR < 0.2$ ) respectively, while the final community (mHYP3) was not  
260 significantly enriched for either. A similar pattern of associations was observed when assessing four  
261 “subtype communities” defined by the PMI method (**Figure 4B**), with one community each  
262 representing monosomy and disomy (mPMI1 and mPMI4, respectively), and one mixed  
263 disomy/partial monosomy/monosomy community (mPMI2) – however the association was not

264 statistically significant (Fisher's exact test;  $p=0.577$ ). (**Figures 4B** and **S6B**). HYP subtypes were  
265 chosen over PMI subtypes for significant association with known key molecular features of uveal  
266 melanoma and having lower number of samples with negative silhouette width in this cohort  
267 (**Figure S7**).

268

#### 269 *Biological understanding of uveal melanoma subtype communities*

270 Next, we sought to understand these communities by performing GSEA, and discovered that  
271 one of these communities (mHYP1) was significantly enriched ( $FDR<0.05$ ) for gene sets associated  
272 with immune pathways (e.g. cytokine-cytokine receptor interactions, T cell receptor signaling and  
273 JAK-STAT pathway;  $FDR<0.05$ ; **Figure 5A-D**). On the other hand, another subtype (mHYP3) was  
274 associated with neural cell types (e.g. neuron markers, neurotransmitter signaling, neural subtype  
275 glioblastoma; **Figure 5E-H**;  $FDR<0.05$ ). The last communities (mHYP2, mHYP4 and mHYP5) did  
276 not significantly associate with any gene sets. This could indicate that mHYP2 enriched for  
277 chromosome 3 monosomy and mHYP4 may be by disomy, may be defined by that particular  
278 phenotype as opposed to a coherent transcriptomic pattern.

279

#### 280 *Patient prognostic differences between uveal melanoma subtype communities*

281 Since more than 50% uveal melanoma patients undergo metastasis [28], we assessed the  
282 metastasis-free prognosis of the uveal melanoma subtype communities using the GSE22138 [28]  
283 data set. Among the two highly frequent communities, mHYP2 (37%) showed significantly poorest  
284 metastasis-free prognosis, whereas mHYP5 (28%) showed better prognosis. Both mHYP4 (20%)  
285 and mHYP1 (11%) communities showed intermediate prognosis (**Figure 6A**).

286

#### 287 *Validation of uveal melanoma subtype communities*

288           Due to the low frequency of some of these communities in this dataset (5% mHYP3, 11%  
289 mHYP1), we sought to validate them in an independent dataset consisting of 58 patients with uveal  
290 melanoma (GSE44295). Patients were assigned to subtypes based on the correlation of their gene  
291 expression profile with the prediction analysis of microarrays (PAM) [29] centroids of each  
292 community. In the validation cohort, 31% of patients were assigned to the mHYP1 (immune-  
293 enriched) group, 19% mHYP2 (monosomy-enriched), 14% mHYP3 (neural-enriched), 5% mHYP4  
294 (undetermined) and 31% mHYP5 (disomy/partial monosomy-enriched). In terms of prognosis,  
295 these groups showed statistically significant differential metastasis-free survival ( $p = 0.00747$ ;  
296 **Figure 6B**). Analogous to the previous dataset, mHYP2 and mHYP5 communities showed poor and  
297 good prognosis respectively. While mHYP1 showed intermediate prognosis, mHYP4 couldn't be  
298 assessed due to low sample size of only 5% ( $n=3$ ). Interestingly and similar to the training  
299 (GSE22138) dataset, 82% of mHYP2 (monosomy-enriched) group in the validation cohort  
300 underwent metastasis during follow-up, compared to only 11% of the mHYP5 (disomy/partial  
301 monosomy-enriched) group patients. In addition, 33% of intermediate prognostic mHYP4  
302 (undetermined) and 44% mixed prognostic mHYP1 (immune-enriched) patients experienced  
303 metastasis. With increased frequency of mHYP3 (neural-enriched) community, we observed that it  
304 has poor overall survival and 57% of the mHYP3 samples were undergoing metastasis (**Figure 6B**).  
305 Overall, this identifies and validates novel uveal melanoma subtype communities and their  
306 prognostic significance.

307

### 308 *Comparison of subtype communities to known uveal melanoma classes*

309           Previously, transcriptomic subtypes of uveal melanoma have been defined by clustering of  
310 gene expression profiles. Two classes were discovered – class 1, with good prognosis and  
311 association with chromosome 3 disomy; and class 2, with poor prognosis, associated with  
312 chromosome 3 monosomy and metastasis [25-27]. To reconcile these communities with the gene

313 expression subtypes, we checked for gene set enrichment of the gene signatures [26] for class 1 and  
314 class 2 uveal melanomas in this cohort. The class 2 signature was enriched and borderline enriched  
315 in the mHYP1 community (immune-enriched; FDR < 0.001; **Figure 6C**) and mHYP2 (monosomy;  
316 FDR = 0.27; **Figure 6D**) groups, respectively, whereas, unexpectedly, the class 1 signature was not  
317 significantly enriched in any other group. This may indicate that the class 1 signature may be a  
318 heterogeneous set of patients who are not confined to any of our given community. Overall, this  
319 suggest that our novel uveal melanoma subtype communities reveal additional heterogeneity with  
320 clinical significance that requires further investigation.

321

## 322 **Conclusions**

323 These results demonstrate that no one clustering algorithm should be relied on to produce  
324 clusters which are robust and capture all heterogeneity in a dataset. Instead, multiple algorithms  
325 should be applied to the same dataset, and their results compared and reconciled. Our polyCluster  
326 tool provides a straightforward interface to cluster datasets using multiple algorithms, provides  
327 statistics on the quality of each clustering, and allows the user to fully understand how each result is  
328 related through multiple reconciliations. The demonstration that some low-frequency clusters –  
329 which may be lost or discarded as outliers if only one algorithm is applied – are consistently  
330 identified across algorithms lends credence to their validity, and here such communities were  
331 additionally validated in an independent dataset. Thus, the reconciliation of multiple clustering  
332 results enables finer stratification of patients' molecular profiles enabling more focused biological  
333 profiling.

334

335

## 336 **Methods**

### 337 **Datasets**

338           The breast cancer dataset [22] consists of 118 gene expression profiles generated from  
339 frozen resected samples. Patients in this were mostly early-stage, and were a mixture of node- and  
340 ER-positive and -negative. The discovery uveal melanoma dataset (GSE22138 [28]) consists of  
341 gene expression profiles for 63 untreated patients, chromosome 3 monosomy status and follow-up  
342 metastasis-free survival information. The validation dataset (GSE44295 [30]) contains 58 gene  
343 expression profiles from enucleation specimens, with metastasis-free survival information.

344

### 345 **Finding the optimal number of clusters**

346           It is not optimal for each of the above clustering methods to find local solutions which  
347 depend on the initial conditions, rather than robust clusterings that are stable over various input  
348 parameters. To address this, consensus clustering approaches repeat several iterations of the same  
349 algorithm using different random starting points, and can also perform the clustering over different  
350 subsets of samples. Consensus clustering for each algorithm was performed over a range of  $k$ -values  
351 from 2 to 10 and over multiple subsets of the data. The results of the consensus clustering were then  
352 inspected in order to determine the optimal  $k$ . Determining the optimal  $k$  from visual inspection  
353 alone is subjective, and so quantification of the consensus clustering is required. Here, the  
354 cophenetic correlation coefficient [31] and the silhouette width [21] were used to score each  
355 clustering.

356

### 357 **Hypergeometric test**

358           Previous works have used the hypergeometric test to determine if different algorithms'  
359 subtypes correspond to one another [10]. In this pipeline, comparisons can be made between any

360 number of clustering algorithms. The hypergeometric test based false discovery rate (FDR)  
361 indicating the significance of the size of the overlap between two clusters was used.

362

### 363 **Statistical analysis**

364 FDR values for enrichment of gene sets were reported as calculated by the Broad Institute's  
365 GSEA software [32]. Kaplan-Meier analysis was used to assess survival and p-values determined  
366 from the log-rank test. PAM analysis to generate centroids and assign subtypes using Pearson  
367 correlation and gene expression data was done as previously described [11].

368

### 369 **Software**

370 Code for hierarchical and k-means consensus clustering was adapted from the  
371 *ConsensusClusterPlus* v1.36.0 [33] R package. NMF was performed via the *nmf* v0.20.6 R package  
372 [34]. The *igraph* R package v1.0.1[35] was used for plotting networks and community detection.  
373 Silhouette width was calculated and plotted using the *silhouette* function from the R package *cluster*  
374 v2.0.4 [36]. Survival analysis was performed using the *survival* v2.39-5 R package [37]. GSEA was  
375 performed using the Broad Institute GSEA software [32]. The pipeline described in this paper is  
376 publicly available on GitHub at <https://github.com/syspremed/polyClustR>.

377

378

379

380

381



## 382 **Declarations**

### 383 **Availability of data and material**

384 Gene expression data analysed in this study are publicly available from the original publications  
385 (breast cancer data [22] and uveal melanoma [28], [30]) and through ArrayExpress with access  
386 number E-TABM-158 (breast) and Gene Expression Omnibus (GEO) with accession numbers  
387 GSE22138 and GSE44295 (uveal melanoma).

388

### 389 **Competing interests**

390 A. Sadanandam has ownership interest (including patents) as a patent inventor for a patent entitled  
391 "Colorectal cancer classification with different prognosis and personalized therapeutic responses"  
392 (patent number PCT/IB2013/060416). No potential conflicts of interest were disclosed by the other  
393 authors.

394

### 395 **Authors' contributions**

396 KE wrote the manuscript, developed the polyCluster package, performed all the experiments and  
397 analysed the results. GN helped with the statistical methods and oversaw the data analysis. AS  
398 conceived the idea, interpreted the results and wrote the manuscript.

399

### 400 **Acknowledgments**

401 We acknowledge NHS funding to the NIHR Biomedical Research Centre at The Royal Marsden  
402 and the ICR.

403

404

405

## 406 **References**

- 407 1. Hudis CA: **Trastuzumab — Mechanism of Action and Use in Clinical Practice.** *New*  
408 *Engl J Med* 2007, **357**:39-51.
- 409 2. Sadanandam A, Lyssiotis CA, Homicsko K, Collisson EA, Gibb WJ, Wullschlegler S, Ostos  
410 LCG, Lannon WA, Grotzinger C, Del Rio M, et al: **A colorectal cancer classification**  
411 **system that associates cellular phenotype and responses to therapy.** *Nature*  
412 *Medicine* 2013, **19**:619-625.
- 413 3. Song N, Pogue-Geile KL, Gavin PG, Yothers G, Rim Kim S, Johnson NL, Lipchick C,  
414 Allegra CJ, Petrelli NJ, O'Connell MJ, et al: **Clinical outcome from oxaliplatin**  
415 **treatment in stage II/III colon cancer according to intrinsic subtypes: Secondary**  
416 **analysis of NASBP C-07/NRG oncology randomized clinical trial.** *JAMA Oncology*  
417 2016, **2**:1162-1169.
- 418 4. Collisson EA, Sadanandam A, Olson P, Gibb WJ, Truitt M, Gu S, Cooc J, Weinkle J, Kim GE,  
419 Jakkula L: **Subtypes of pancreatic ductal adenocarcinoma and their differing**  
420 **responses to therapy.** *Nature Medicine* 2011, **17**:500-503.
- 421 5. Moffitt RA, Marayati R, Flate EL, Volmar KE, Loeza SGH, Hoadley KA, Rashid NU,  
422 Williams LA, Eaton SC, Chung AH, et al: **Virtual microdissection identifies distinct**  
423 **tumor- and stroma-specific subtypes of pancreatic ductal adenocarcinoma.**  
424 *Nature Genetics* 2015, **47**:1168-1178.
- 425 6. Heiser LM, Sadanandam A, Kuo W-L, Benz SC, Goldstein TC, Ng S, Gibb WJ, Wang NJ,  
426 Ziyad S, Tong F, et al: **Subtype and pathway specific responses to anticancer**  
427 **compounds in breast cancer.** *Proceedings of the National Academy of Sciences* 2012,  
428 **109**:2724-2729.
- 429 7. Perou CM, Sørlie T, Eisen MB, van de Rijn M, Jeffrey SS, Rees CA, Pollack JR, Ross DT,  
430 Johnsen H, Akslen LA, et al: **Molecular portraits of human breast tumours.** *Nature*  
431 2000, **406**:747-752.
- 432 8. Wu L, Liu Z, Xu J, Chen M, Fang H, Tong W, Xiao W: **NETBAGs: a network-based**  
433 **clustering approach with gene signatures for cancer subtyping analysis.**  
434 *Biomarkers in medicine* 2015, **9**:1053-1065.
- 435 9. Han J, Pei J, Kamber M: **Data Mining: Concepts and Techniques.** *Elsevier* 2011, **3rd**  
436 **Edition.**
- 437 10. Sadanandam A, Wang X, de Sousa EMF, Gray JW, Vermeulen L, Hanahan D, Medema JP:  
438 **Reconciliation of classification systems defining molecular subtypes of colorectal**  
439 **cancer: interrelationships and clinical implications.** *Cell Cycle* 2014, **13**:353-357.
- 440 11. Guinney J, Dienstmann R, Wang X, de Reyniès A, Schlicker A, Soneson C, Marisa L,  
441 Roepman P, Nyamundanda G, Angelino P, et al: **The consensus molecular subtypes**  
442 **of colorectal cancer.** *Nature Medicine* 2015, **21**:1350-1356.
- 443 12. Navarro JF, Frenk CS, White SDM: **A Universal density profile from hierarchical**  
444 **clustering.** *The Astrophysical Journal* 1997, **490**:493.
- 445 13. Defays D: **An efficient algorithm for a complete link method.** *The Computer Journal*  
446 1977, **20**:364-366.
- 447 14. MacQueen J: **Some methods for classification and analysis of multivariate**  
448 **observations.** *Proceedings of the fifth Berkeley symposium on mathematical statistics*  
449 *and probability* 1967, **1**:281-297.
- 450 15. Lee DD, Seung HS: **Learning the parts of objects by non-negative matrix**  
451 **factorization.** *Nature* 1999, **401**:788-791.

- 452 16. De Sousa E Melo F, Wang X, Jansen M, Fessler E, Trinh A, de Rooij LPMH, de Jong JH, de  
453 Boer OJ, van Leersum R, Bijlsma MF, et al: **Poor-prognosis colon cancer is defined by**  
454 **a molecularly distinct subtype and develops from serrated precursor lesions.**  
455 *Nature Medicine* 2013, **19**:614-618.
- 456 17. Budinska E, Popovici V, Tejpar S, D'Ario G, Lapique N, Sikora KO, Di Narzo AF, Yan P,  
457 Graeme Hodgson J, Weinrich S, et al: **Gene expression patterns unveil a new level of**  
458 **molecular heterogeneity in colorectal cancer.** *Journal of Pathology* 2013, **231**:63-  
459 76.
- 460 18. Marisa L, de Reyniès A, Duval A, Selves J, Gaub MP, Vescovo L, Etienne-Grimaldi MC,  
461 Schiappa R, Guenot D, Ayadi M, et al: **Gene expression classification of colon cancer**  
462 **into molecular subtypes: characterization, validation, and prognostic value.** *PLoS*  
463 *Medicine* 2013, **10**.
- 464 19. Roepman P, Schlicker A, Tabernero J, Majewski I, Tian S, Moreno V, Snel MH, Chresta  
465 CM, Rosenberg R, Nitsche U, et al: **Colorectal cancer intrinsic subtypes predict**  
466 **chemotherapy benefit, deficient mismatch repair and epithelial-to-mesenchymal**  
467 **transition.** *International Journal of Cancer* 2013, **134**:552-562.
- 468 20. Schlicker A, Beran G, Chresta CM, McWalter G, Pritchard A, Weston S, Runswick S,  
469 Davenport S, Heathcote K, Castro DA, et al: **Subtypes of primary colorectal tumors**  
470 **correlate with response to targeted treatment in colorectal cell lines.** *BMC*  
471 *Medical Genomics* 2012, **5**:1-15.
- 472 21. Rousseeuw PJ: **Silhouettes: A graphical aid to the interpretation and validation of**  
473 **cluster analysis.** *Journal of Computational and Applied Mathematics* 1987, **20**:53-65.
- 474 22. Chin K, DeVries S, Fridlyand J, Spellman PT, Roydasgupta R, Kuo WL, Lapuk A, Neve  
475 RM, Qian Z, Ryder T, et al: **Genomic and transcriptional aberrations linked to**  
476 **breast cancer pathophysiologies.** *Cancer Cell* 2006, **10**:529-541.
- 477 23. Sorlie T, Tibshirani R, Parker J, Hastie T, Marron JS, Nobel A, Deng S, Johnsen H, Pesich  
478 R, Geisler S, et al: **Repeated observation of breast tumor subtypes in independent**  
479 **gene expression data sets.** *Proc Natl Acad Sci USA* 2003, **100**:8418-8423.
- 480 24. Raghavan UN, Albert R, Kumara S: **Near linear time algorithm to detect community**  
481 **structures in large-scale networks.** *Physical Review E* 2007, **76**:36106.
- 482 25. Onken MD, Worley LA, Ehlers JP, Harbour JW: **Gene Expression Profiling in Uveal**  
483 **Melanoma Reveals Two Molecular Classes and Predicts Metastatic Death**  
484 **Advances in Brief Gene Expression Profiling in Uveal Melanoma Reveals Two**  
485 **Molecular Classes and Predicts Metastatic Death.** *Cancer Res* 2004:7205-7209.
- 486 26. Onken MD, Worley LA, Dávila RM, Char DH, Harbour JW: **Prognostic testing in uveal**  
487 **melanoma by transcriptomic profiling of fine needle biopsy specimens.** *The*  
488 *Journal of molecular diagnostics : JMD* 2006, **8**:567-573.
- 489 27. Worley LA, Onken MD, Person E, Robirds D, Branson J, Char DH, Perry A, Harbour JW:  
490 **Transcriptomic versus chromosomal prognostic markers and clinical outcome in**  
491 **uveal melanoma.** *Clinical Cancer Research* 2007, **13**:1466-1471.
- 492 28. Laurent C, Valet F, Planque N, Silveri L, Maacha S, Anezo O, Hupe P, Plancher C, Reyes C,  
493 Albaud B, et al: **High PTP4A3 phosphatase expression correlates with metastatic**  
494 **risk in uveal melanoma patients.** *Cancer Research* 2011, **71**:666-674.
- 495 29. Tibshirani R, Hastie T, Narasimhan B, Chu G: **Diagnosis of multiple cancer types by**  
496 **shrunk centroids of gene expression.** *Proceedings of the National Academy of*  
497 *Sciences* 2002, **99**:6567-6572.
- 498 30. Triozzi PL, Achberger S, Aldrich W, Crabb JW, Saunthararajah Y, Singh AD: **Association**  
499 **of tumor and plasma microRNA expression with tumor monosomy-3 in patients**  
500 **with uveal melanoma.** *Clinical Epigenetics* 2016, **8**:80.

- 501 31. Sokal RR, Rohlf FJ: **The Comparison of Dendrograms by Objective Methods.** *Taxon*  
502 1962, **11**:33-40.
- 503 32. Subramanian A, Tamayo P, Mootha VK, Mukherjee S, Ebert BL, Gillette MA, Paulovich A,  
504 Pomeroy SL, Golub TR, Lander ES, others: **Gene set enrichment analysis: a**  
505 **knowledge-based approach for interpreting genome-wide expression profiles.**  
506 *Proceedings of the National Academy of Sciences* 2005, **102**:15545-15550.
- 507 33. Wilkerson MD, Hayes DN: **ConsensusClusterPlus: a class discovery tool with**  
508 **confidence assessments and item tracking.** *Bioinformatics* 2010, **26**:1572-1573.
- 509 34. Gaujoux R, Seoighe C: **A flexible R package for nonnegative matrix factorization.**  
510 *BMC Bioinformatics* 2010, **11**:367.
- 511 35. Csárdi G, Nepusz T: **The igraph software package for complex network research.**  
512 *InterJournal Complex Systems* 2006, **1695**:1-9.
- 513 36. Maechler M, Rousseeuw P, Struyf A, Hubert M, Hornik K: **cluster: Cluster Analysis**  
514 **Basics and Extensions.** R package version 2.0.4. edition; 2016.
- 515 37. Therneau T: **A package for survival analysis in S.,** R package version 2.37-4 edition;  
516 2014.
- 517

## 518 **Figure Legends**

519 **Figure 1. An overview of our pipeline for cluster reconciliation.** Gene expression – or other  
520 equivalently structured molecular data – is input as a genes by samples matrix. This data is then fed  
521 through multiple consensus clustering algorithms (in this case, HC, KM and NMF) to produce  
522 multiple clustering solutions. These are then reconciled to create “subtype communities” of similar  
523 clusters from across the algorithms’ solutions, by applying community detection to networks  
524 representing the similarity between clusters from all the algorithms.

525

526 **Figure 2. Breast cancer subtypes and their association with intrinsic subtypes – application of**  
527 **polyCluster. (A-B)** Similarity of each set of clusters generated by consensus A) NMF, B) HC and  
528 C) KM to the known breast cancer subtypes of each sample (as assigned by correlation to PAM  
529 centroids) using 118 breast cancer samples from a published dataset [22]. A hypergeometric test  
530 was used to test the significance of overlap between the clusters and the known subtypes. bNMF,  
531 bHC and bKM represent NMF, HC and KM subtypes, respectively. Norm – normal-like, lumA –  
532 luminal A and lumB – luminal B subtypes.

533

534 **Figure 3. Subtype communities of breast cancer identified using polyCluster. (A)** A  
535 hypergeometric (HYP) test and **(B)** PMI was used to assess the significance of the overlap between  
536 each pair of clusters using Chin breast cancer data set. The resulting FDR corrected p values were  
537 plotted as edge colours/weights in this network, with each node representing a cluster. The size of  
538 each node represents the number of samples that cluster contains, and those nodes in a lighter shade  
539 represent clusters with associations to known subtypes that are not significant (FDR corrected  $p >$   
540 0.05). Gray shading marks dense groups of clusters as defined by network community detection.  
541 bHYP and bPMI represent HYP and PMI subtype breast cancer communities, respectively.

542

543 **Figure 4. Subtype communities of uveal melanoma identified using polyCluster.** (A) A  
544 hypergeometric (HYP) test and (B) PMI was used to assess the significance of the overlap between  
545 each pair of clusters using uveal melanoma data set. The resulting FDR corrected p values were  
546 plotted as edge colours/weights in this network, with each node representing a cluster. The size of  
547 each node represents the number of samples that cluster contains, and those nodes in a lighter shade  
548 represent clusters with associations to known subtypes that are not significant (FDR corrected  $p >$   
549 0.05). Gray shading marks dense groups of clusters as defined by network community detection.  
550 mHYP and mPMI represent HYP and PMI subtype melanoma communities, respectively.

551

552

553 **Figure 5. GSEA enrichment plots** of (A) the mHYP1 uveal melanoma community, showing  
554 significant enrichment of immunity-related gene sets, and (B) the mHYP3 uveal melanoma  
555 community, showing significant enrichment of neural-related gene sets.

556

557 **Figure 6. Prognosis and GSEA analysis of uveal melanoma subtype communities.** (A-B)  
558 Metastasis-free survival in the A) discovery and B) validation cohorts, respectively, was significantly  
559 different between communities. (C-D) GSEA enrichment plots of C) the mHYP1 and (B) the HYP3  
560 uveal melanoma communities, showing significant enrichment of class 2 published subtypes.,

561

**Figure 1**

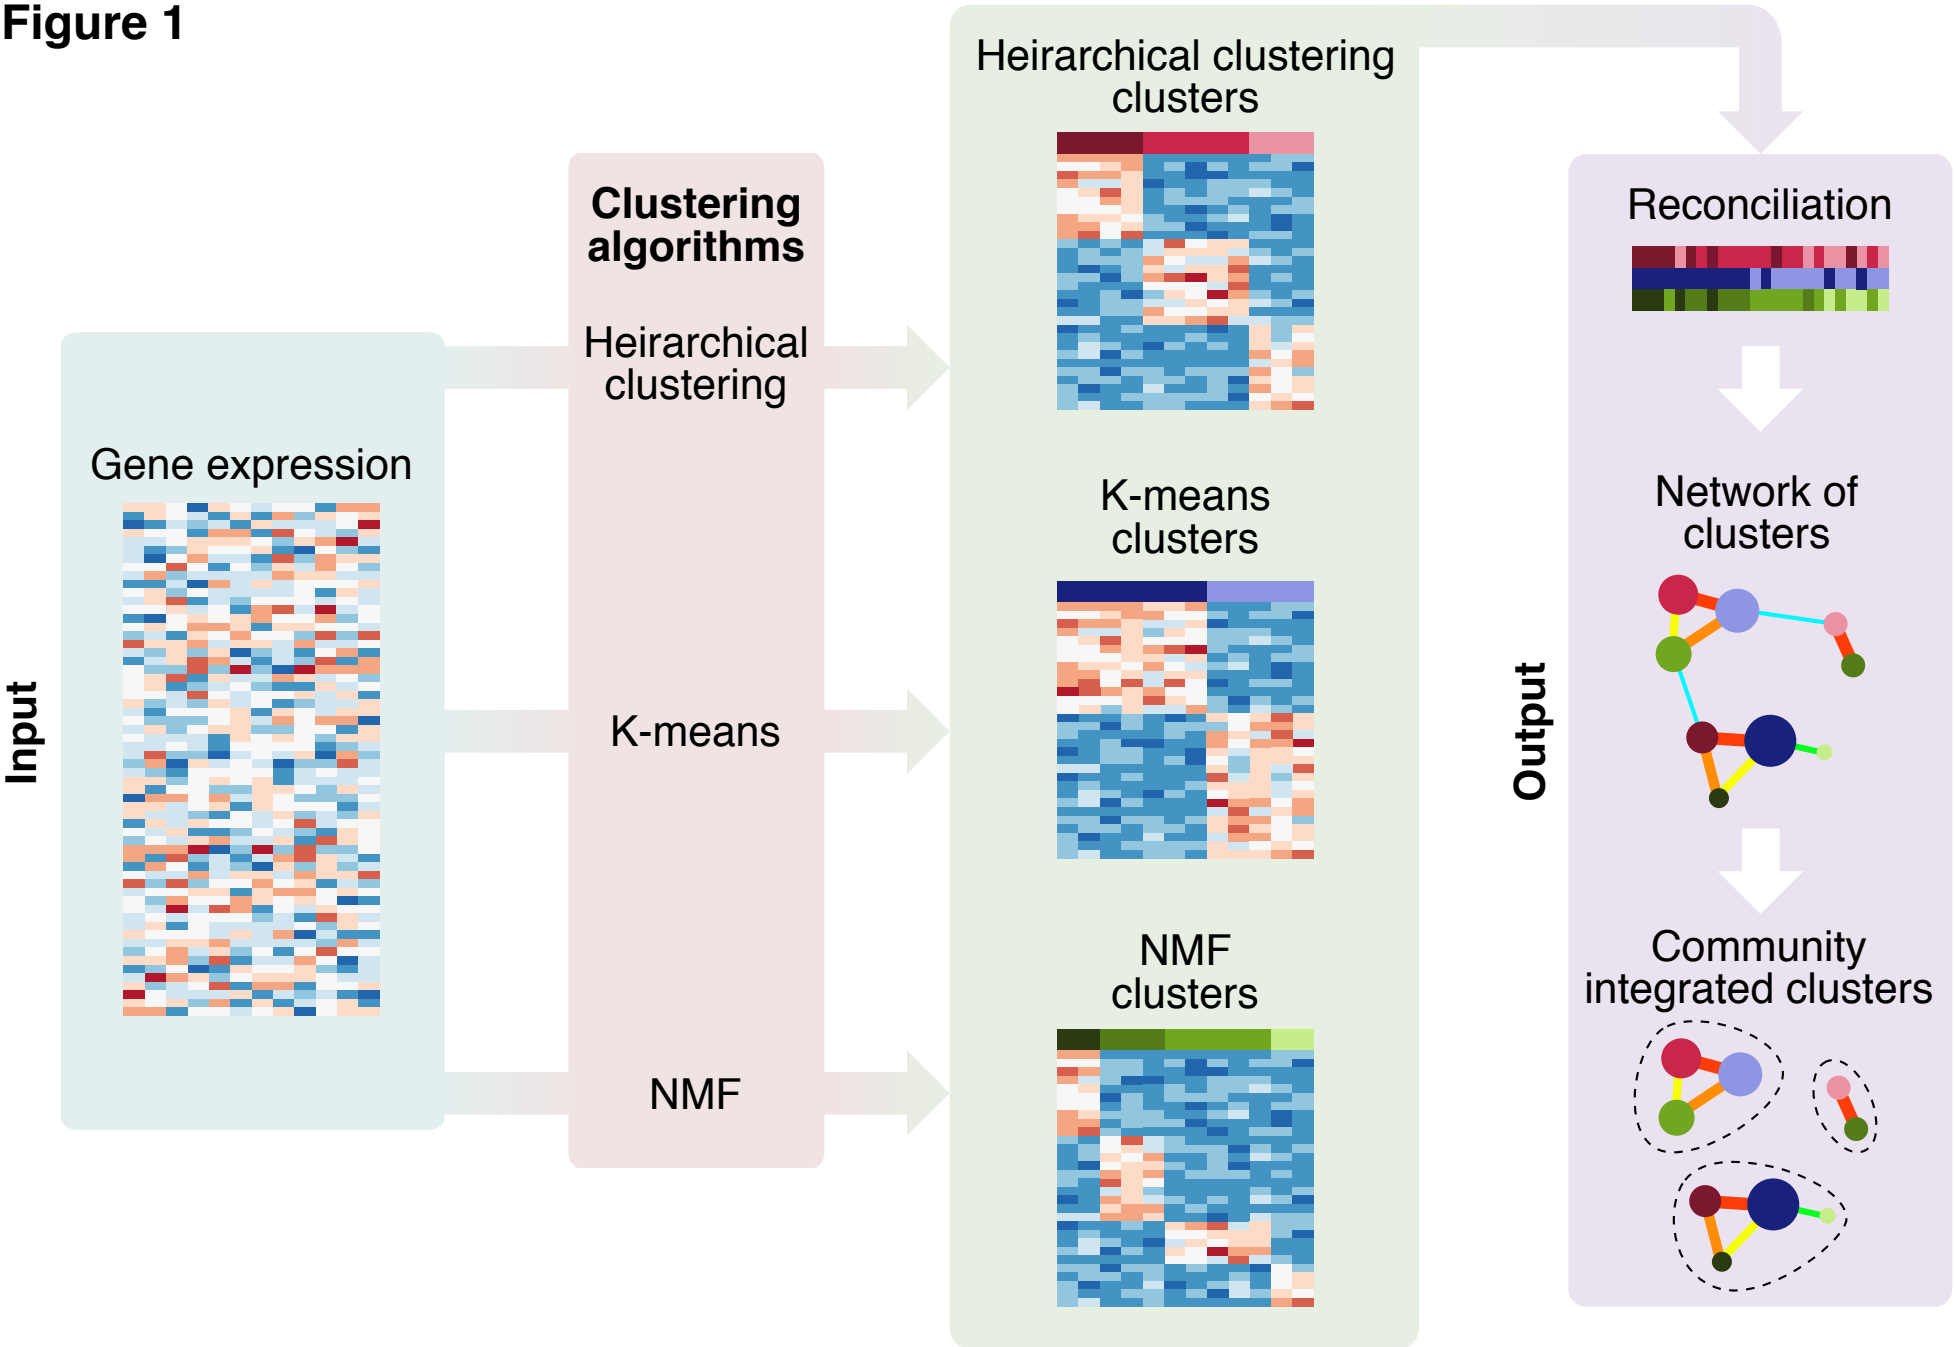

# Figure 2

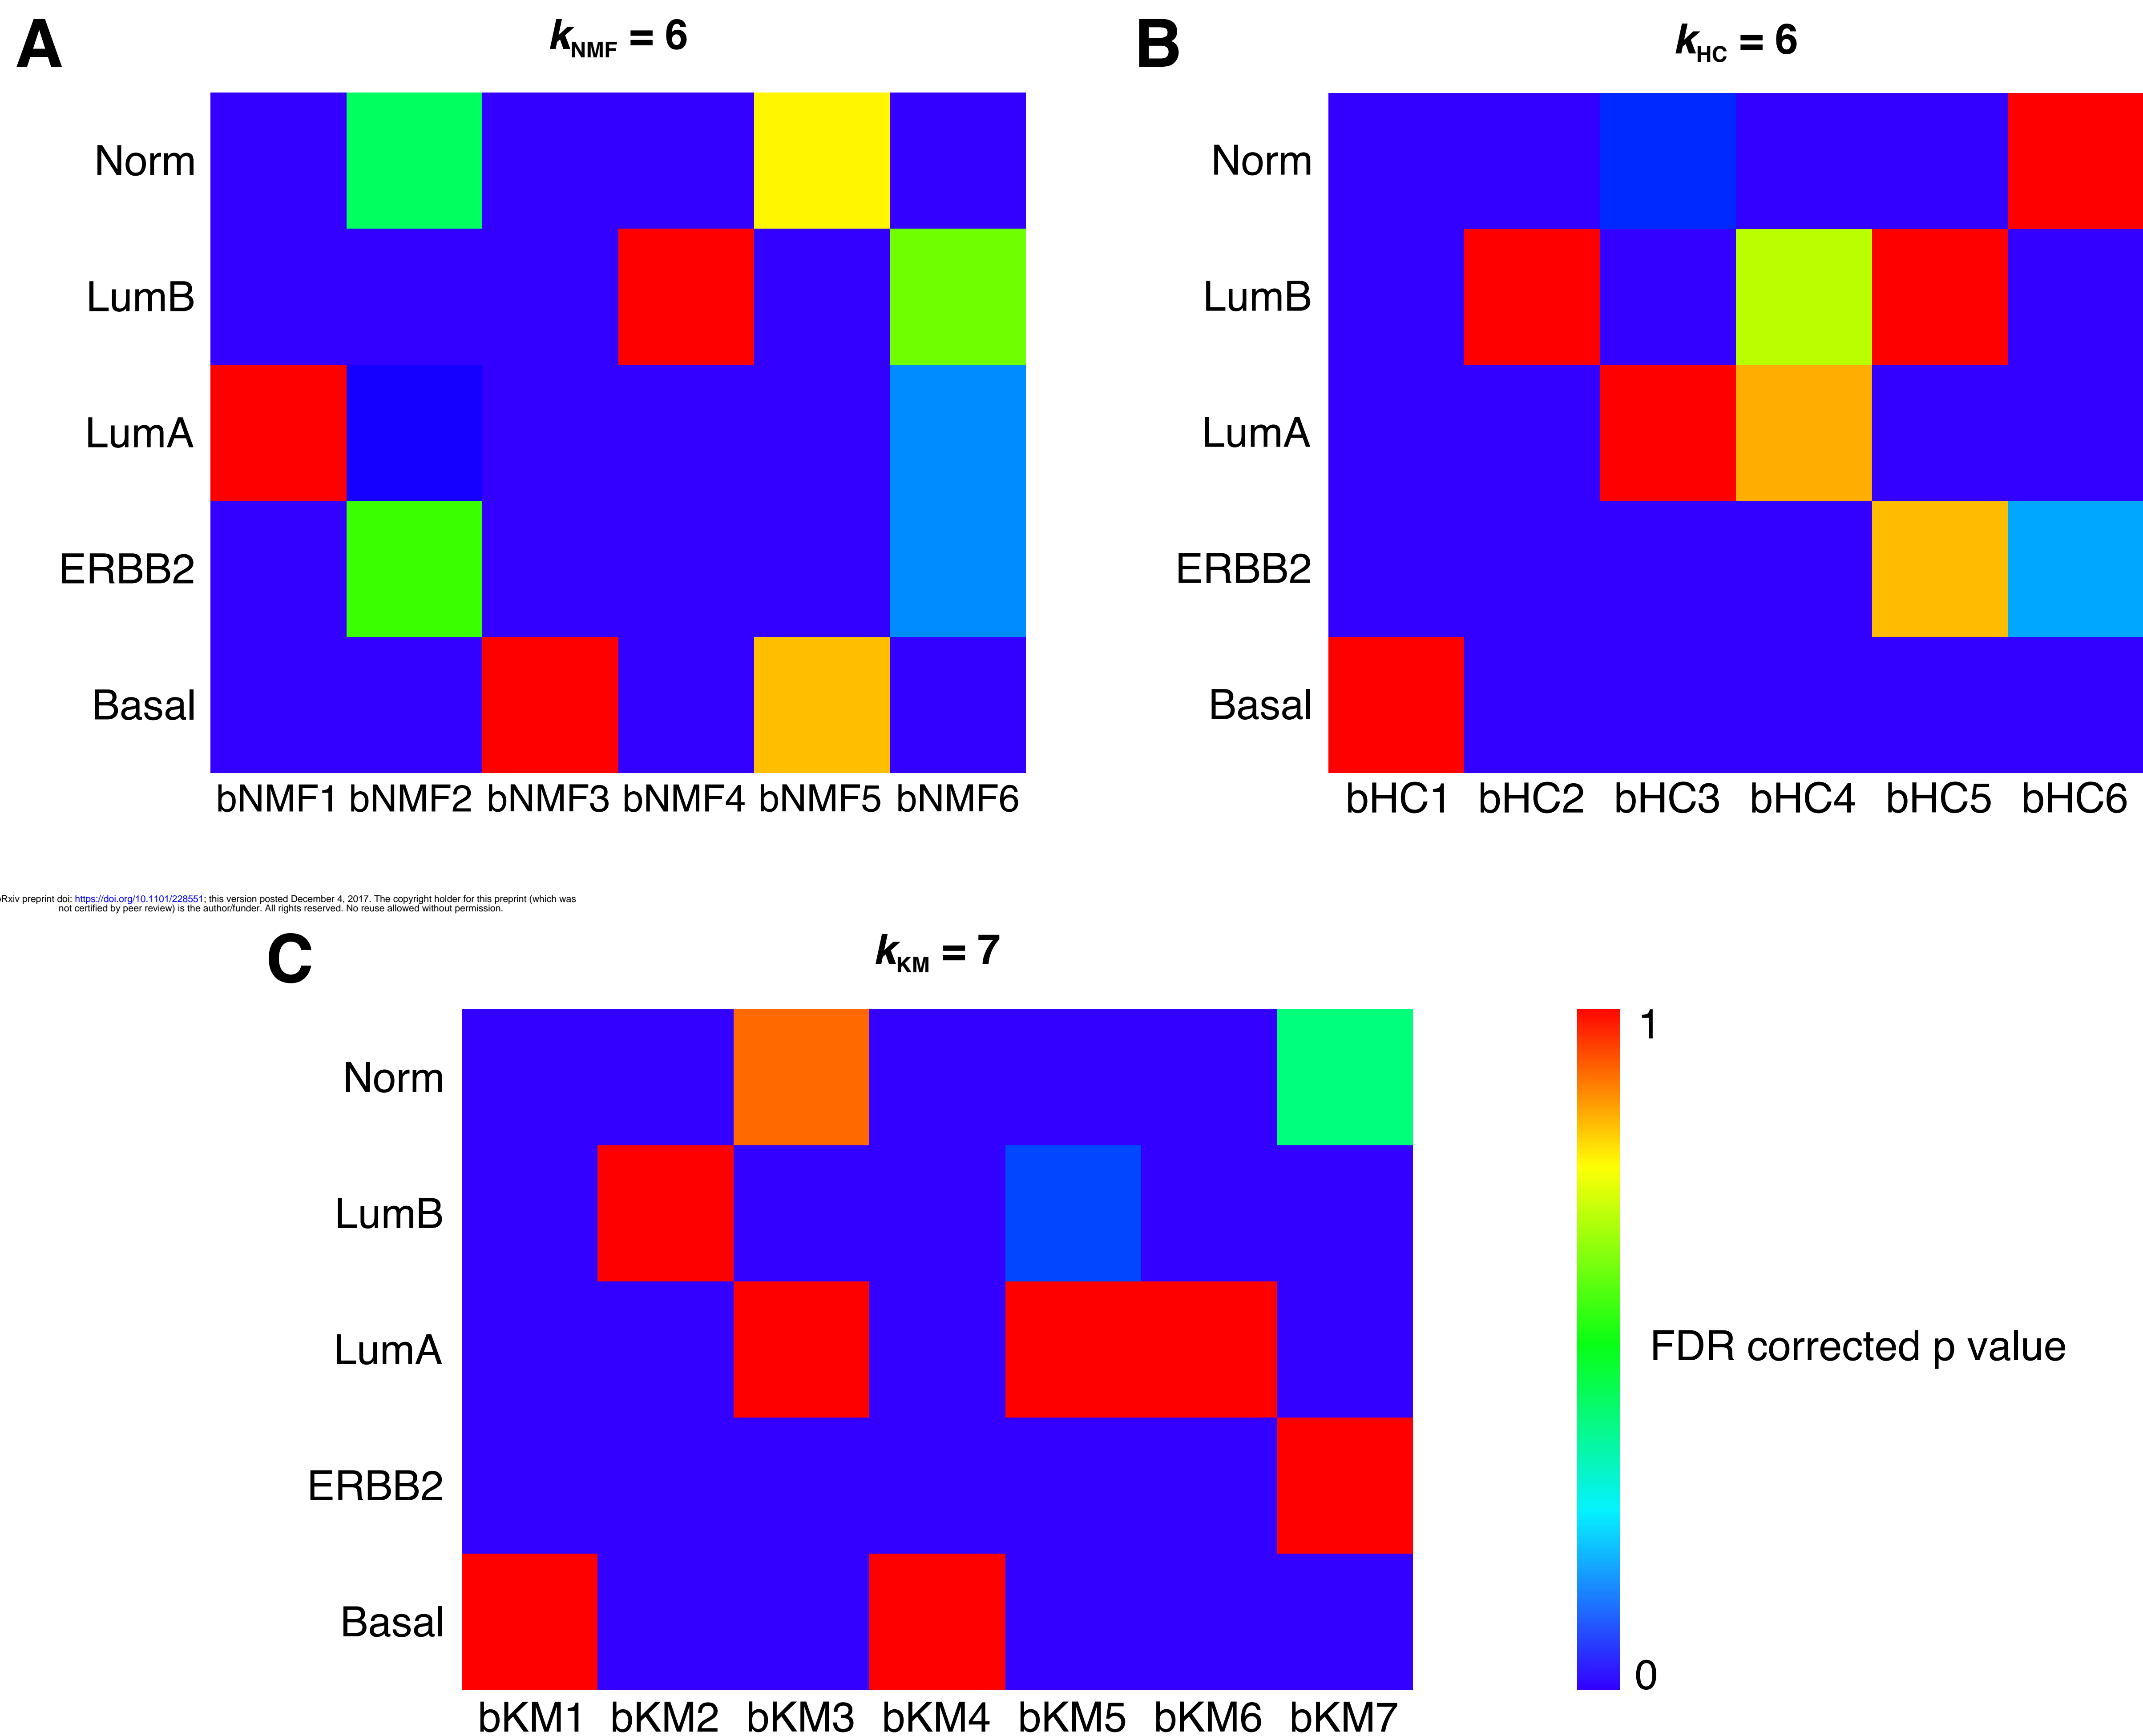



**Figure 3****A**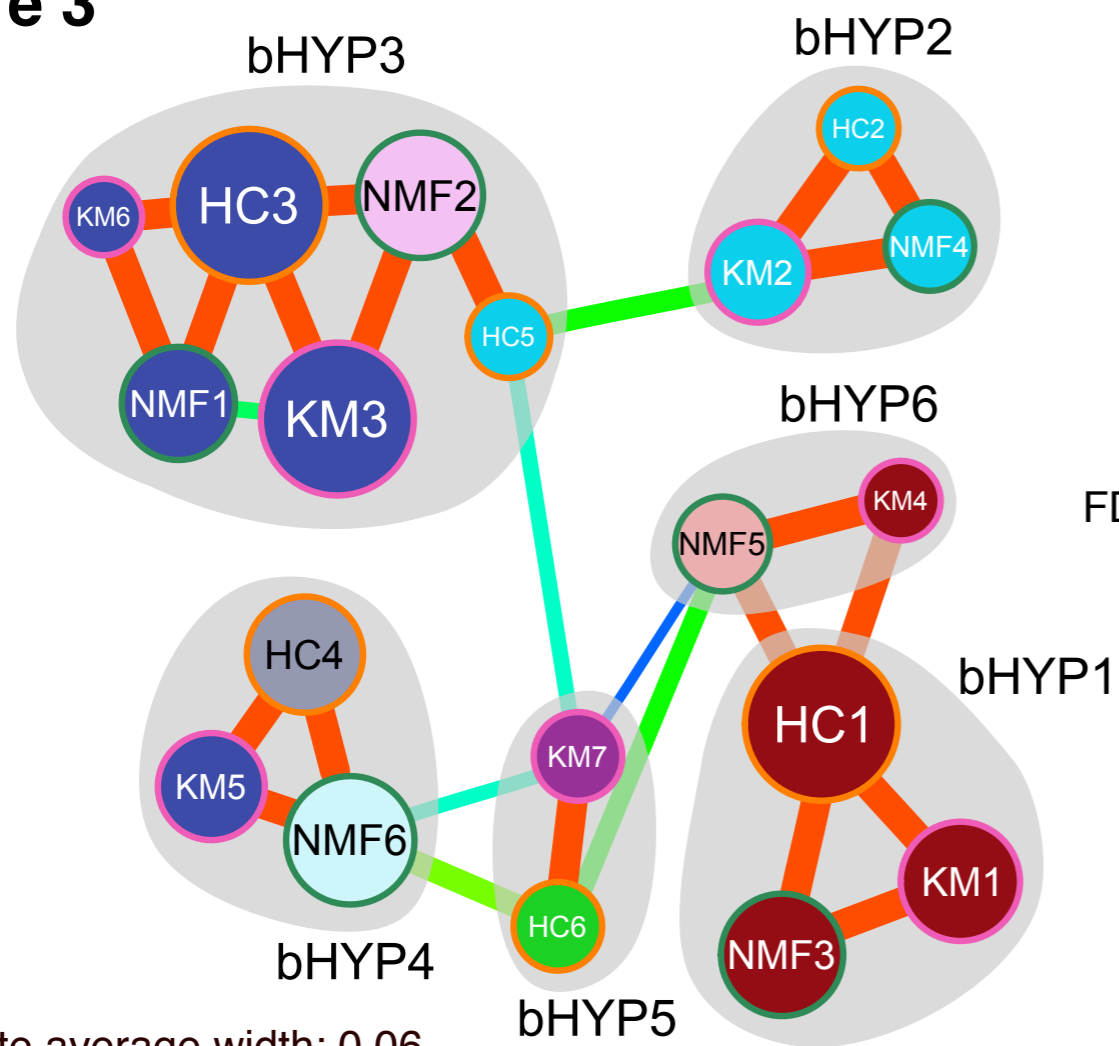

FDR corrected p value

 $\leq 0.05$      $> 0.05$ 

- Basal
- ERBB2
- Lum A
- Lum B
- Norm

- HC
- KM
- NMF

Silhouette average width: 0.06

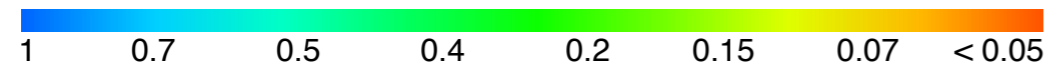

FDR Corrected P-Value

**B**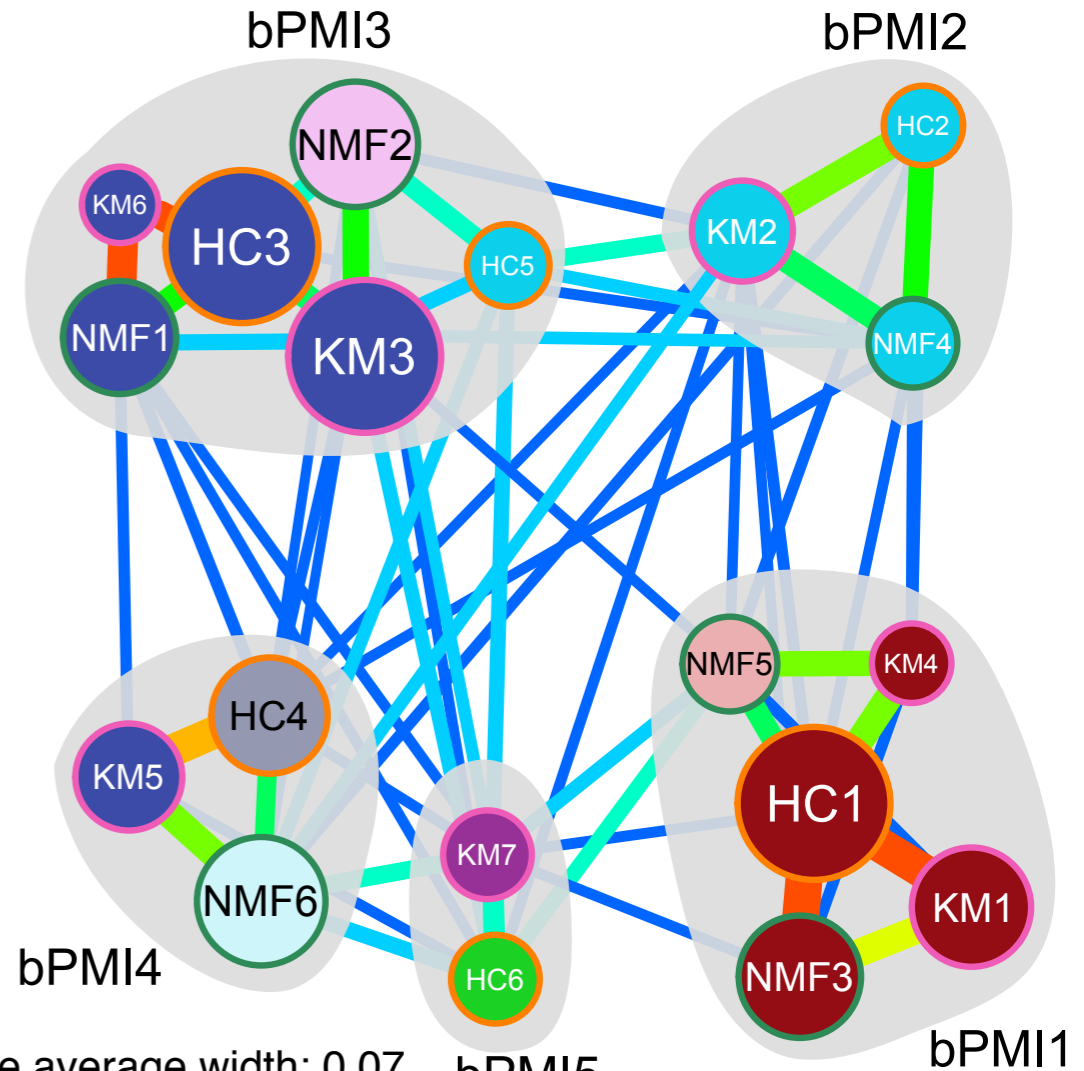

Silhouette average width: 0.07

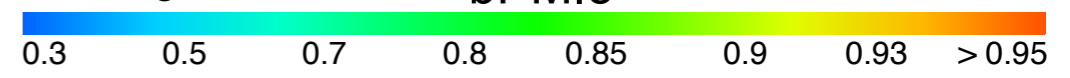

Proportion of Maximum Intersection (PMI)

**Figure 4**

**A**

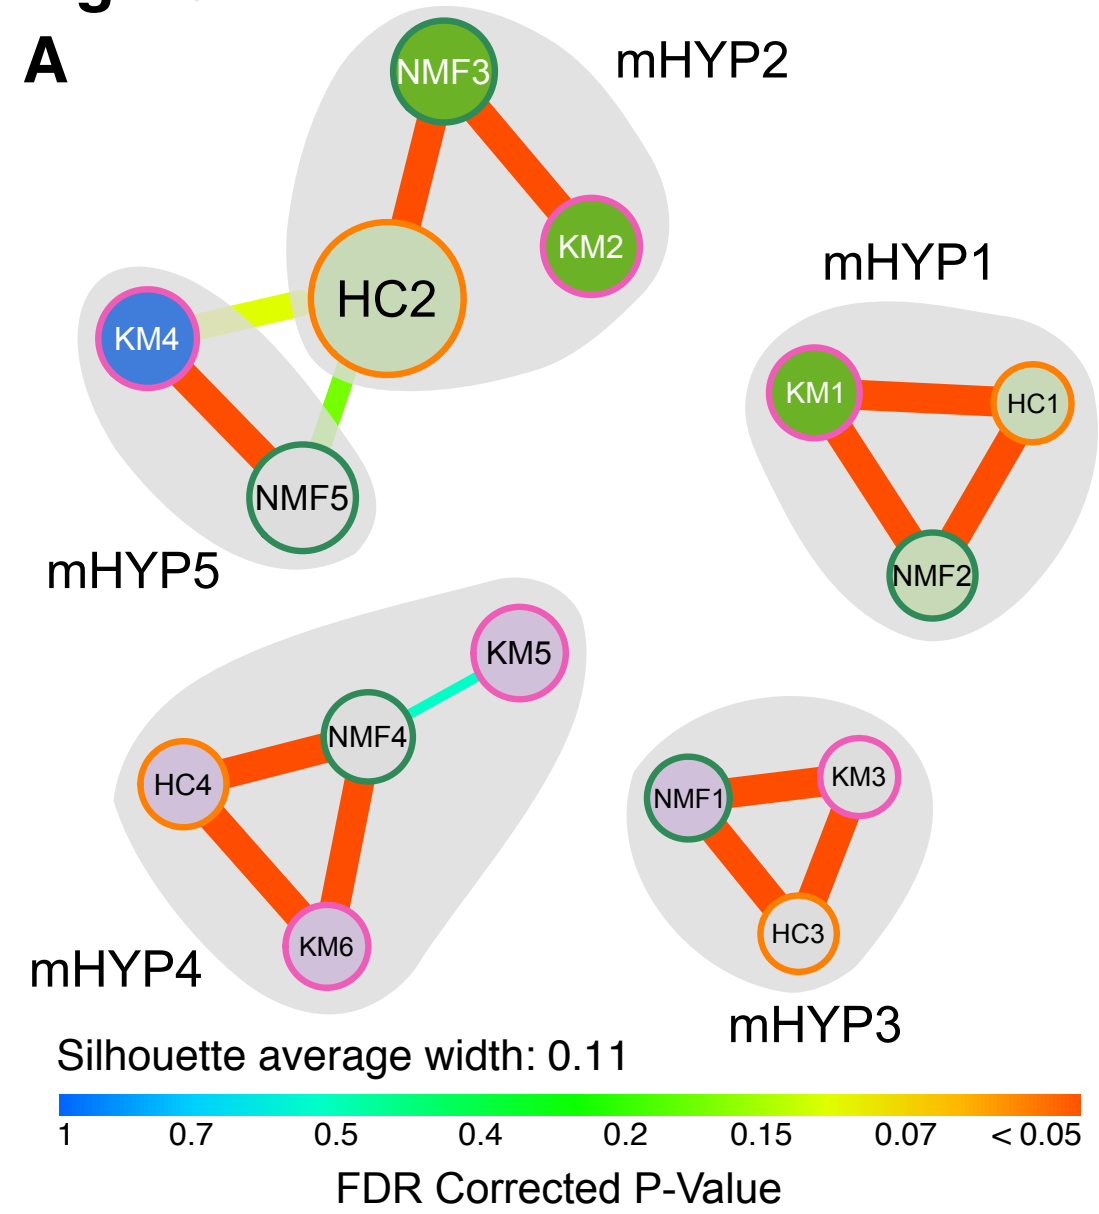

**B**

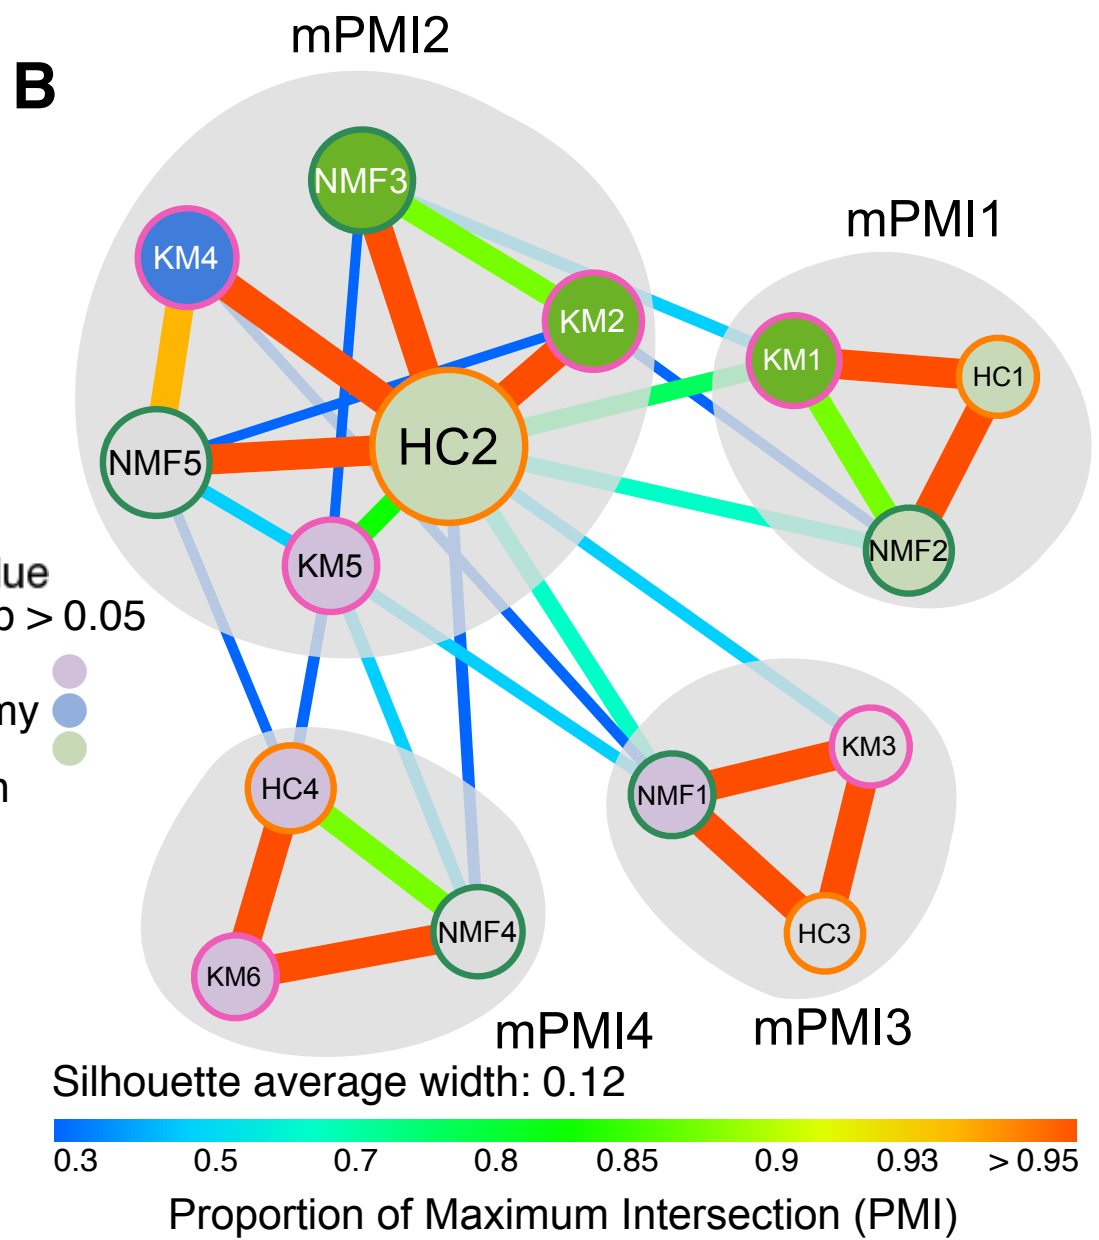

**Figure 5****A****KEGG: T-Cell Receptor Signaling Pathway**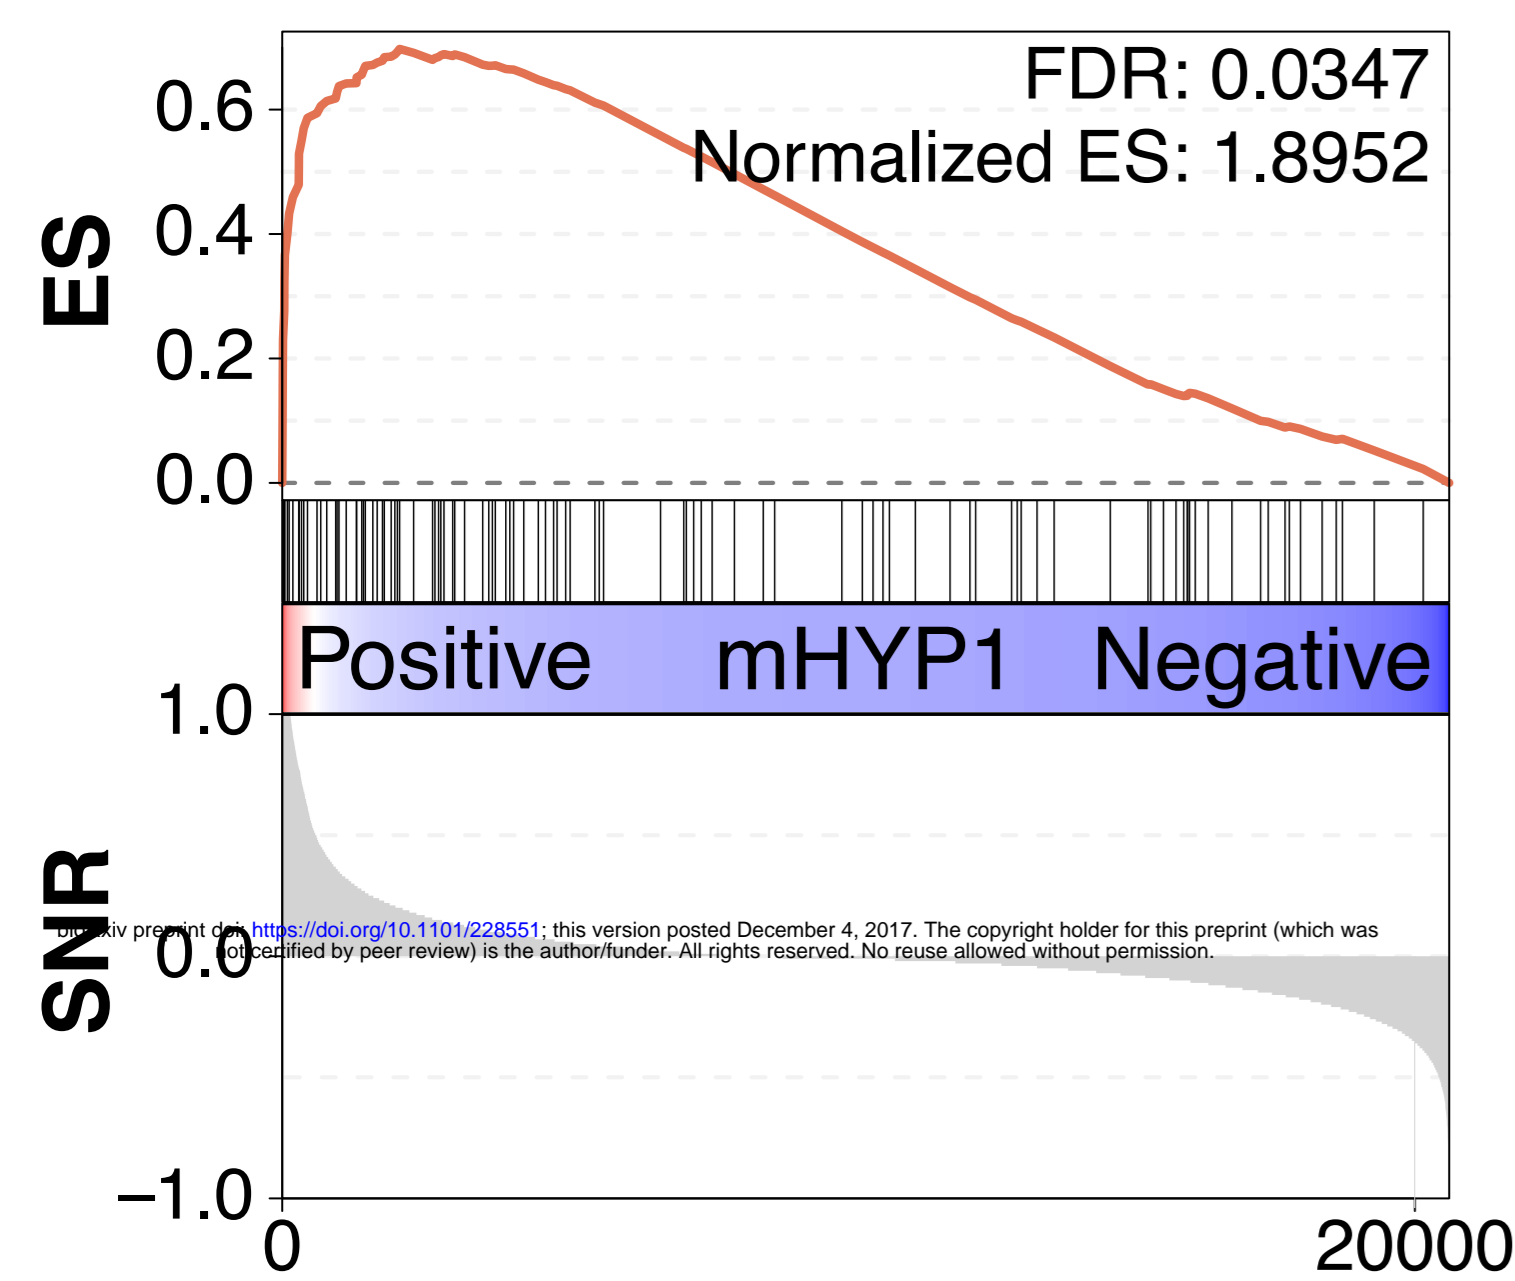**KEGG: Cytokine Cytokine Receptor Interaction**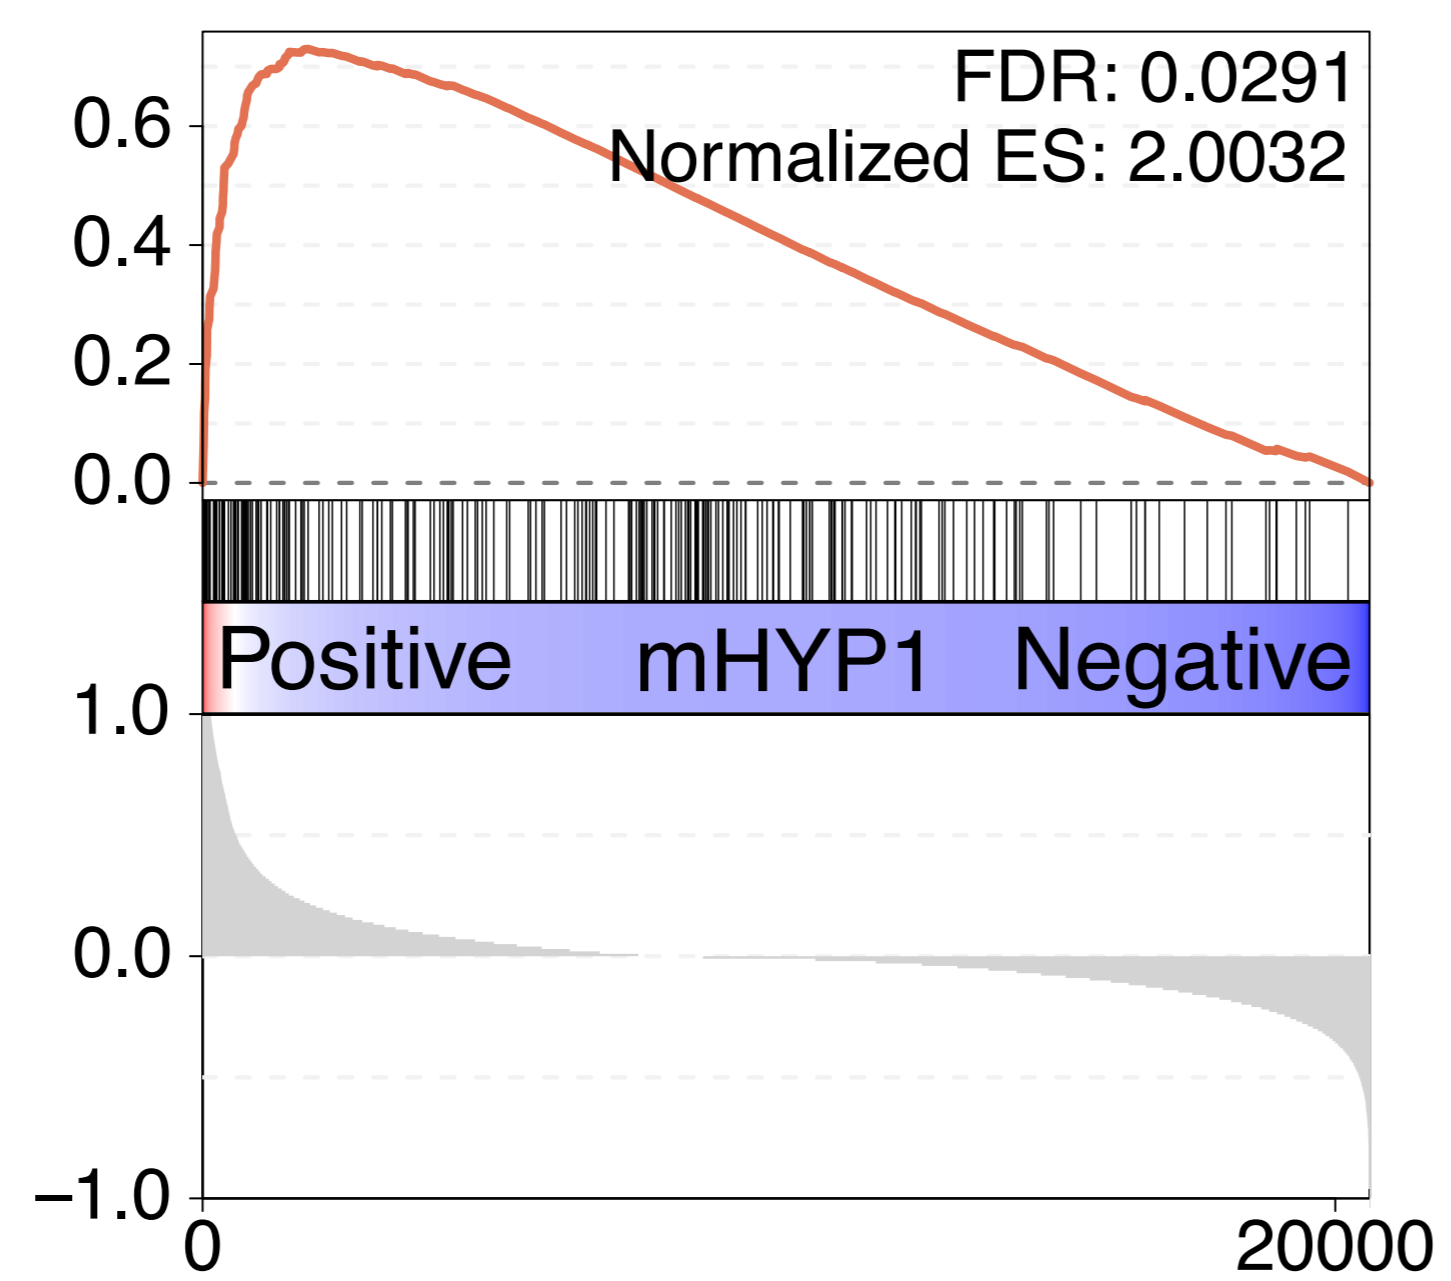**B****Verhaak: Glioblastoma Neural**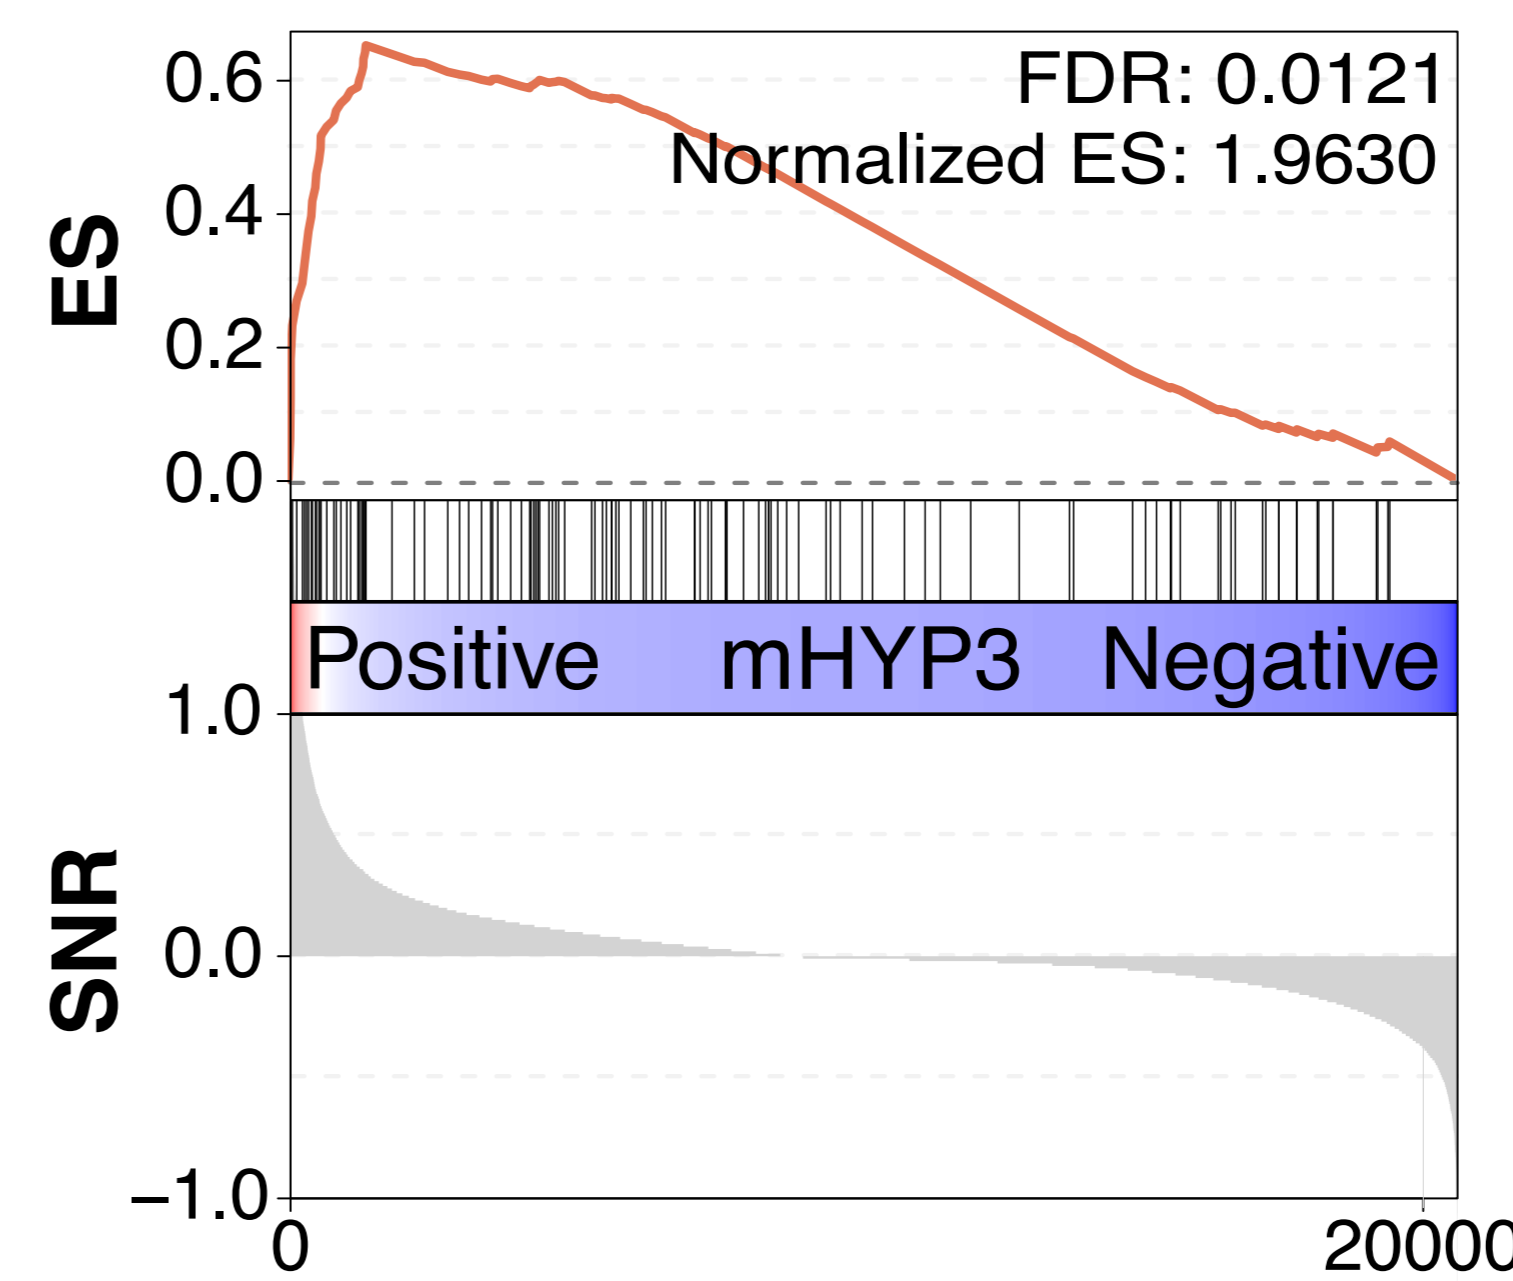**Reactome: Transmission Across Chemical Synapses**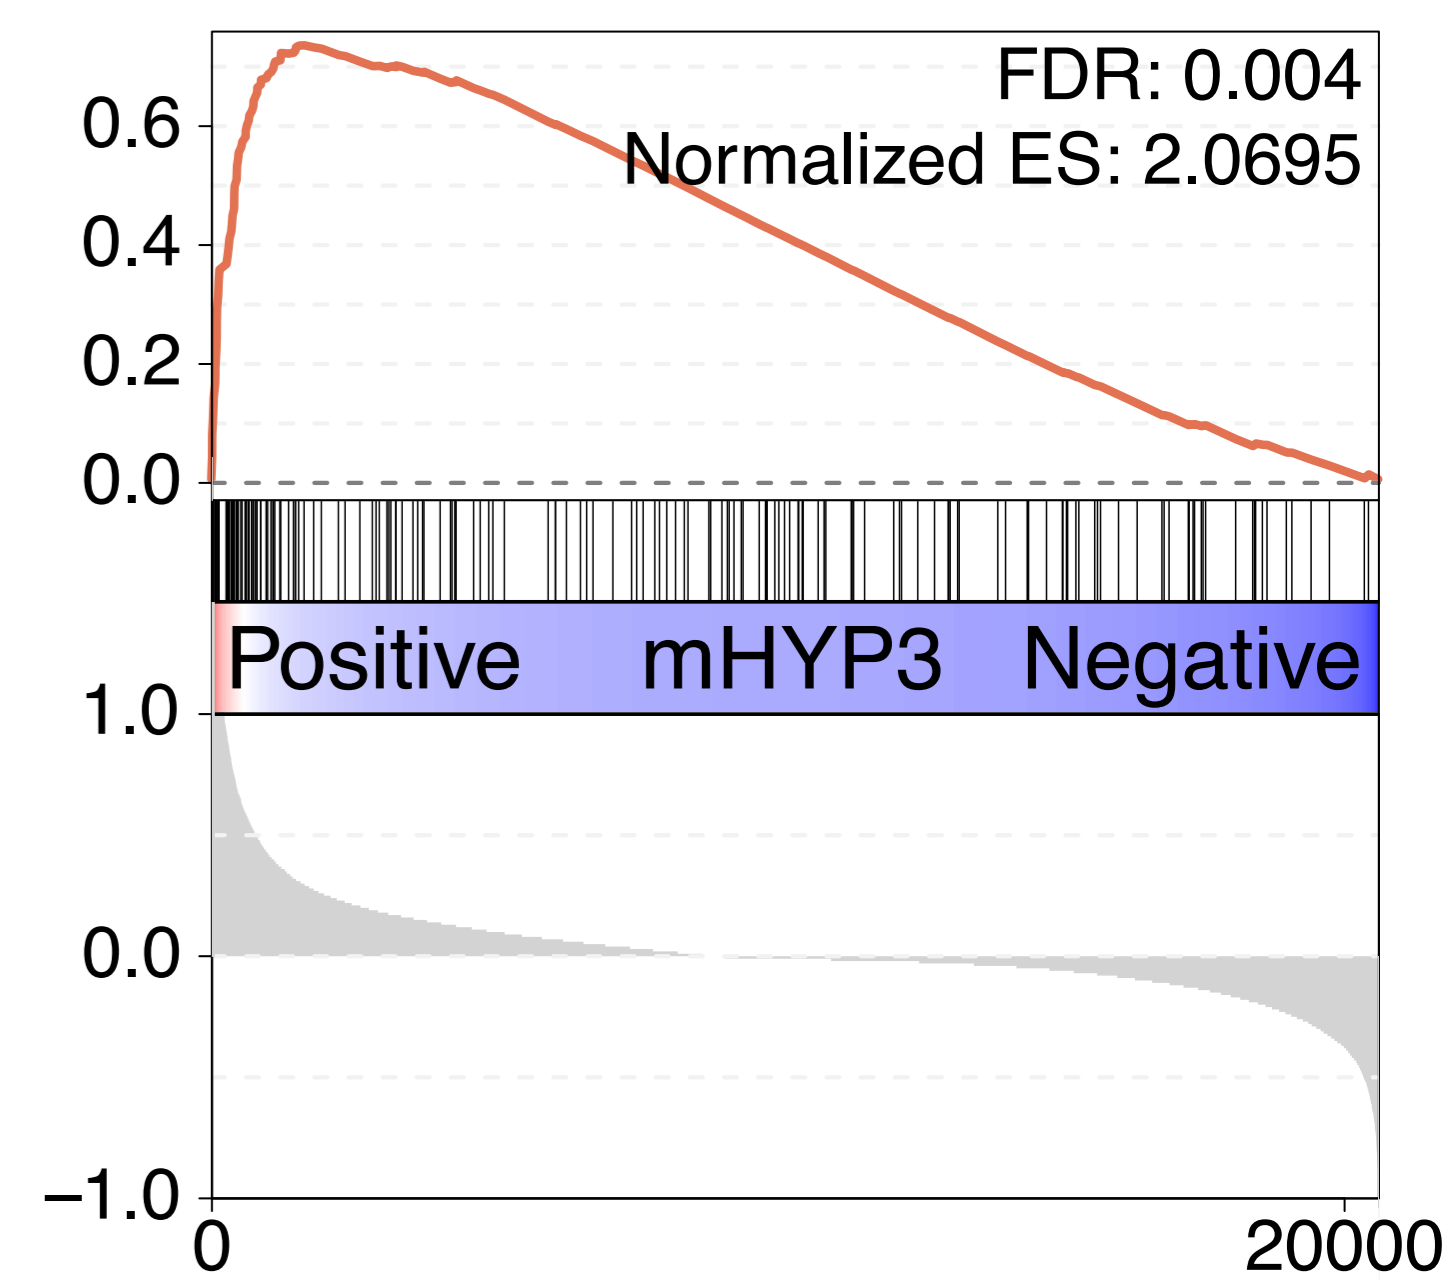**KEGG: JAK STAT Signaling Pathway**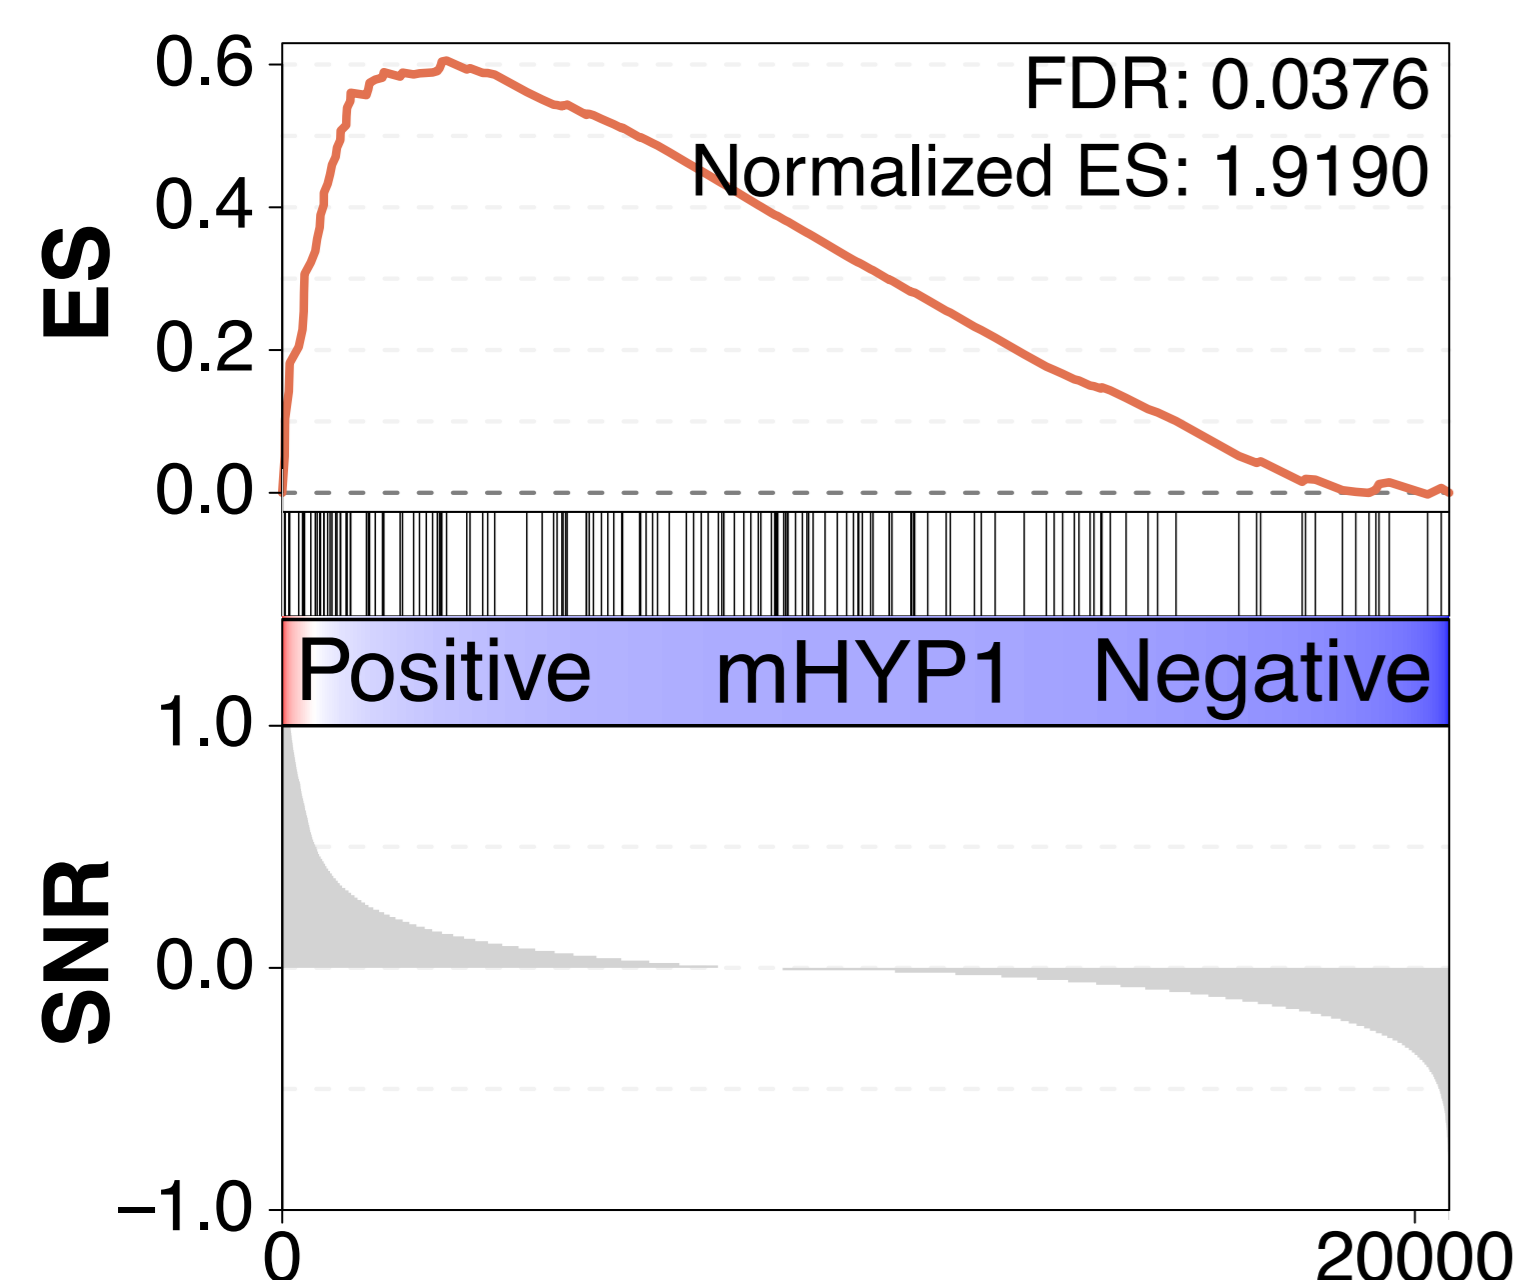**PID: IL2 STAT5 Pathway**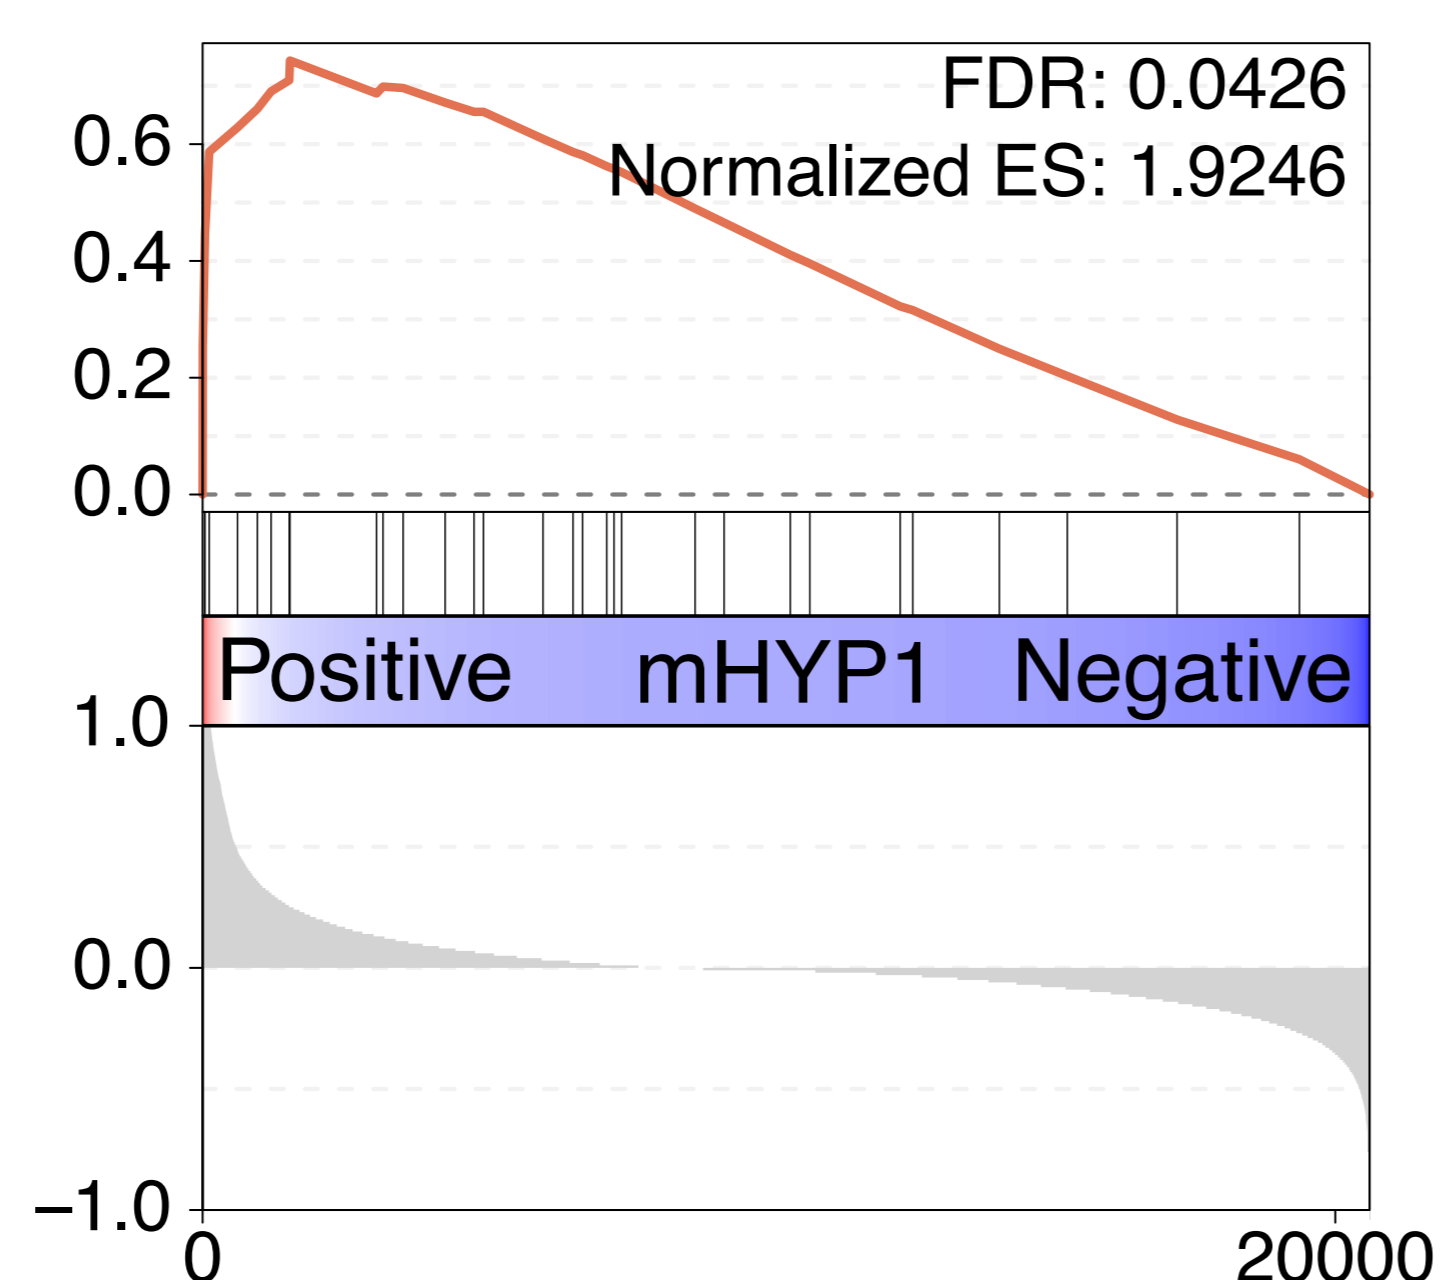**Reactome: Potassium Channels**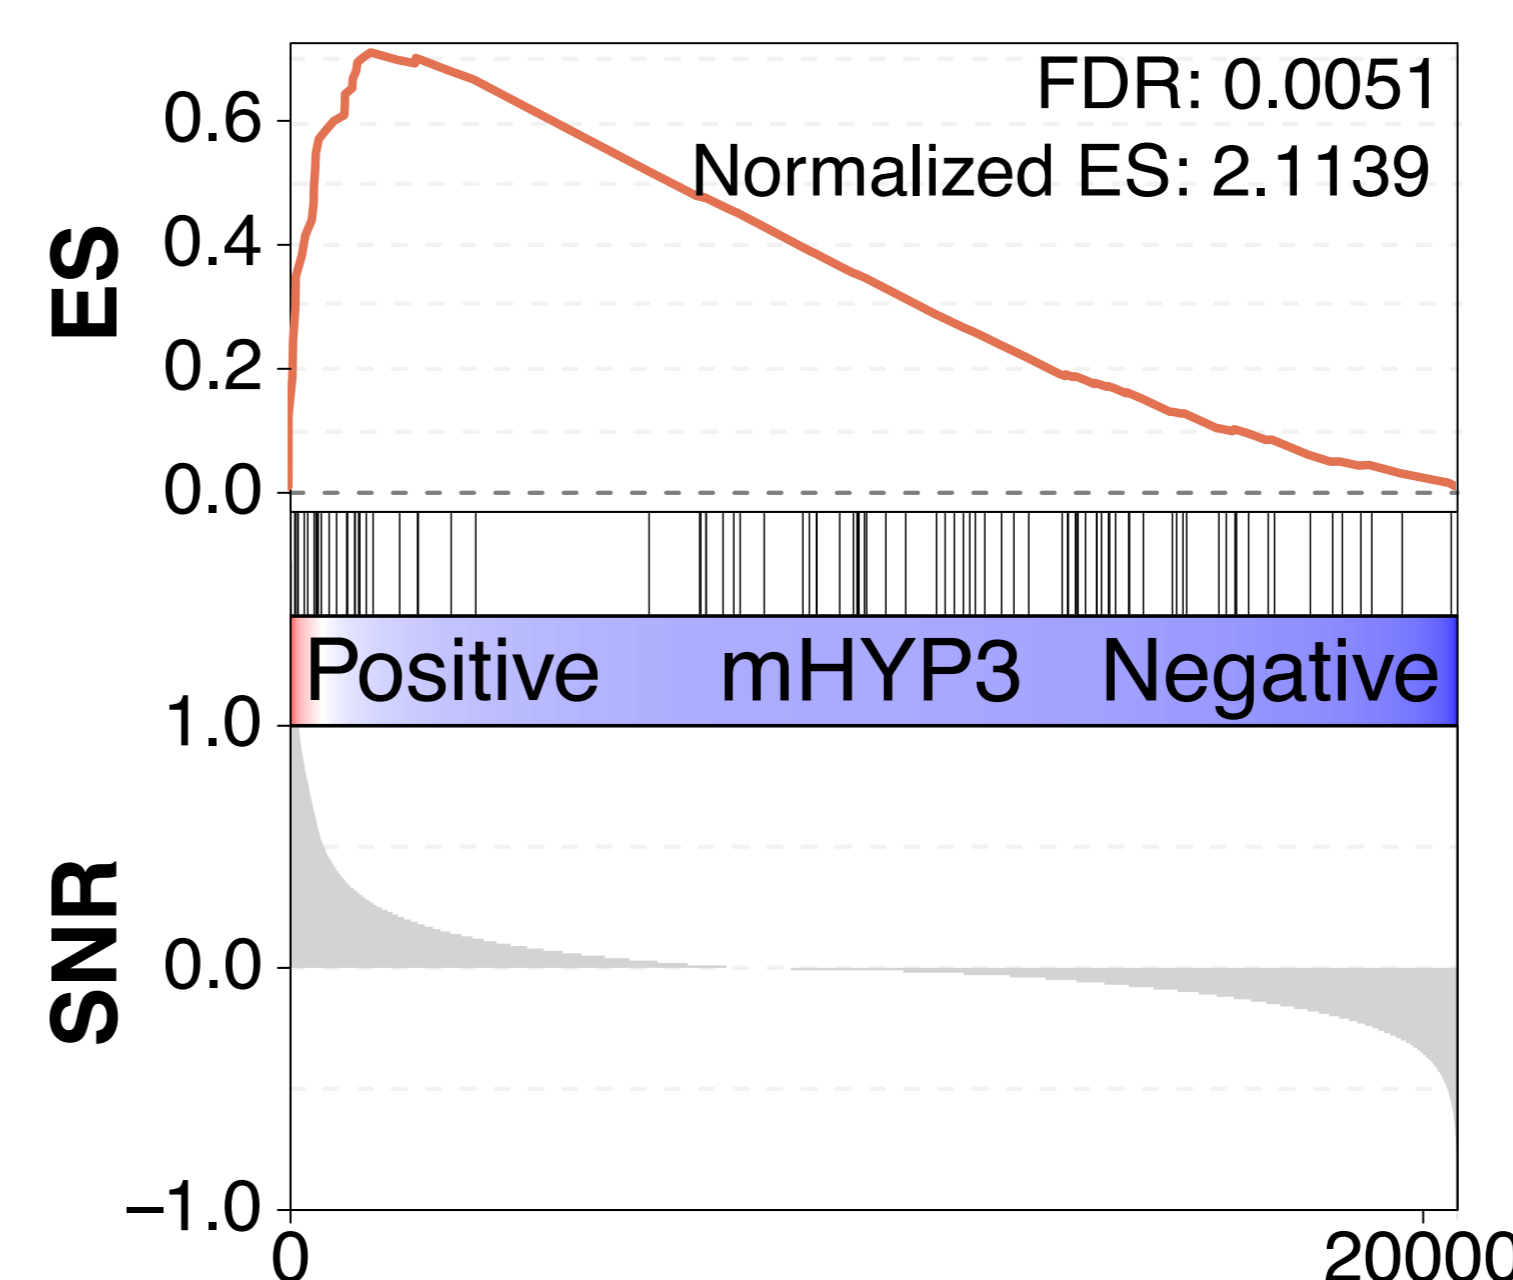**Reactome: Neuron System**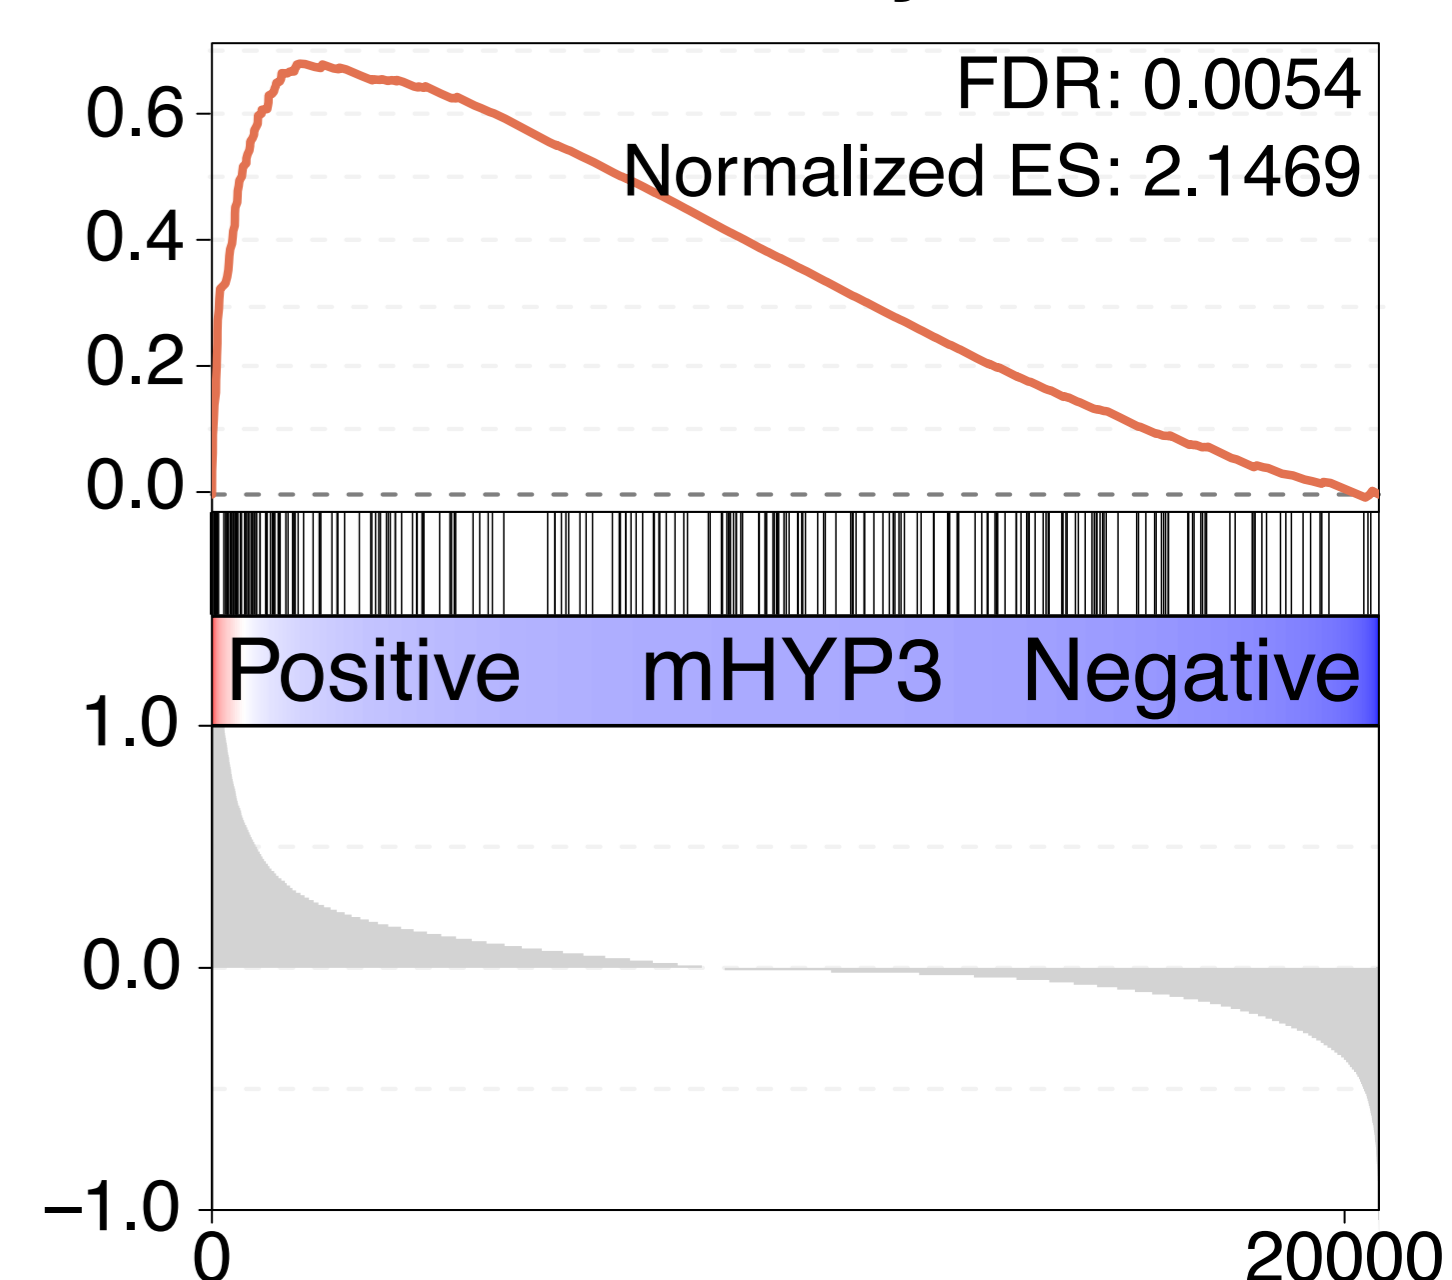

Rank in ordered gene list

**Figure 6**

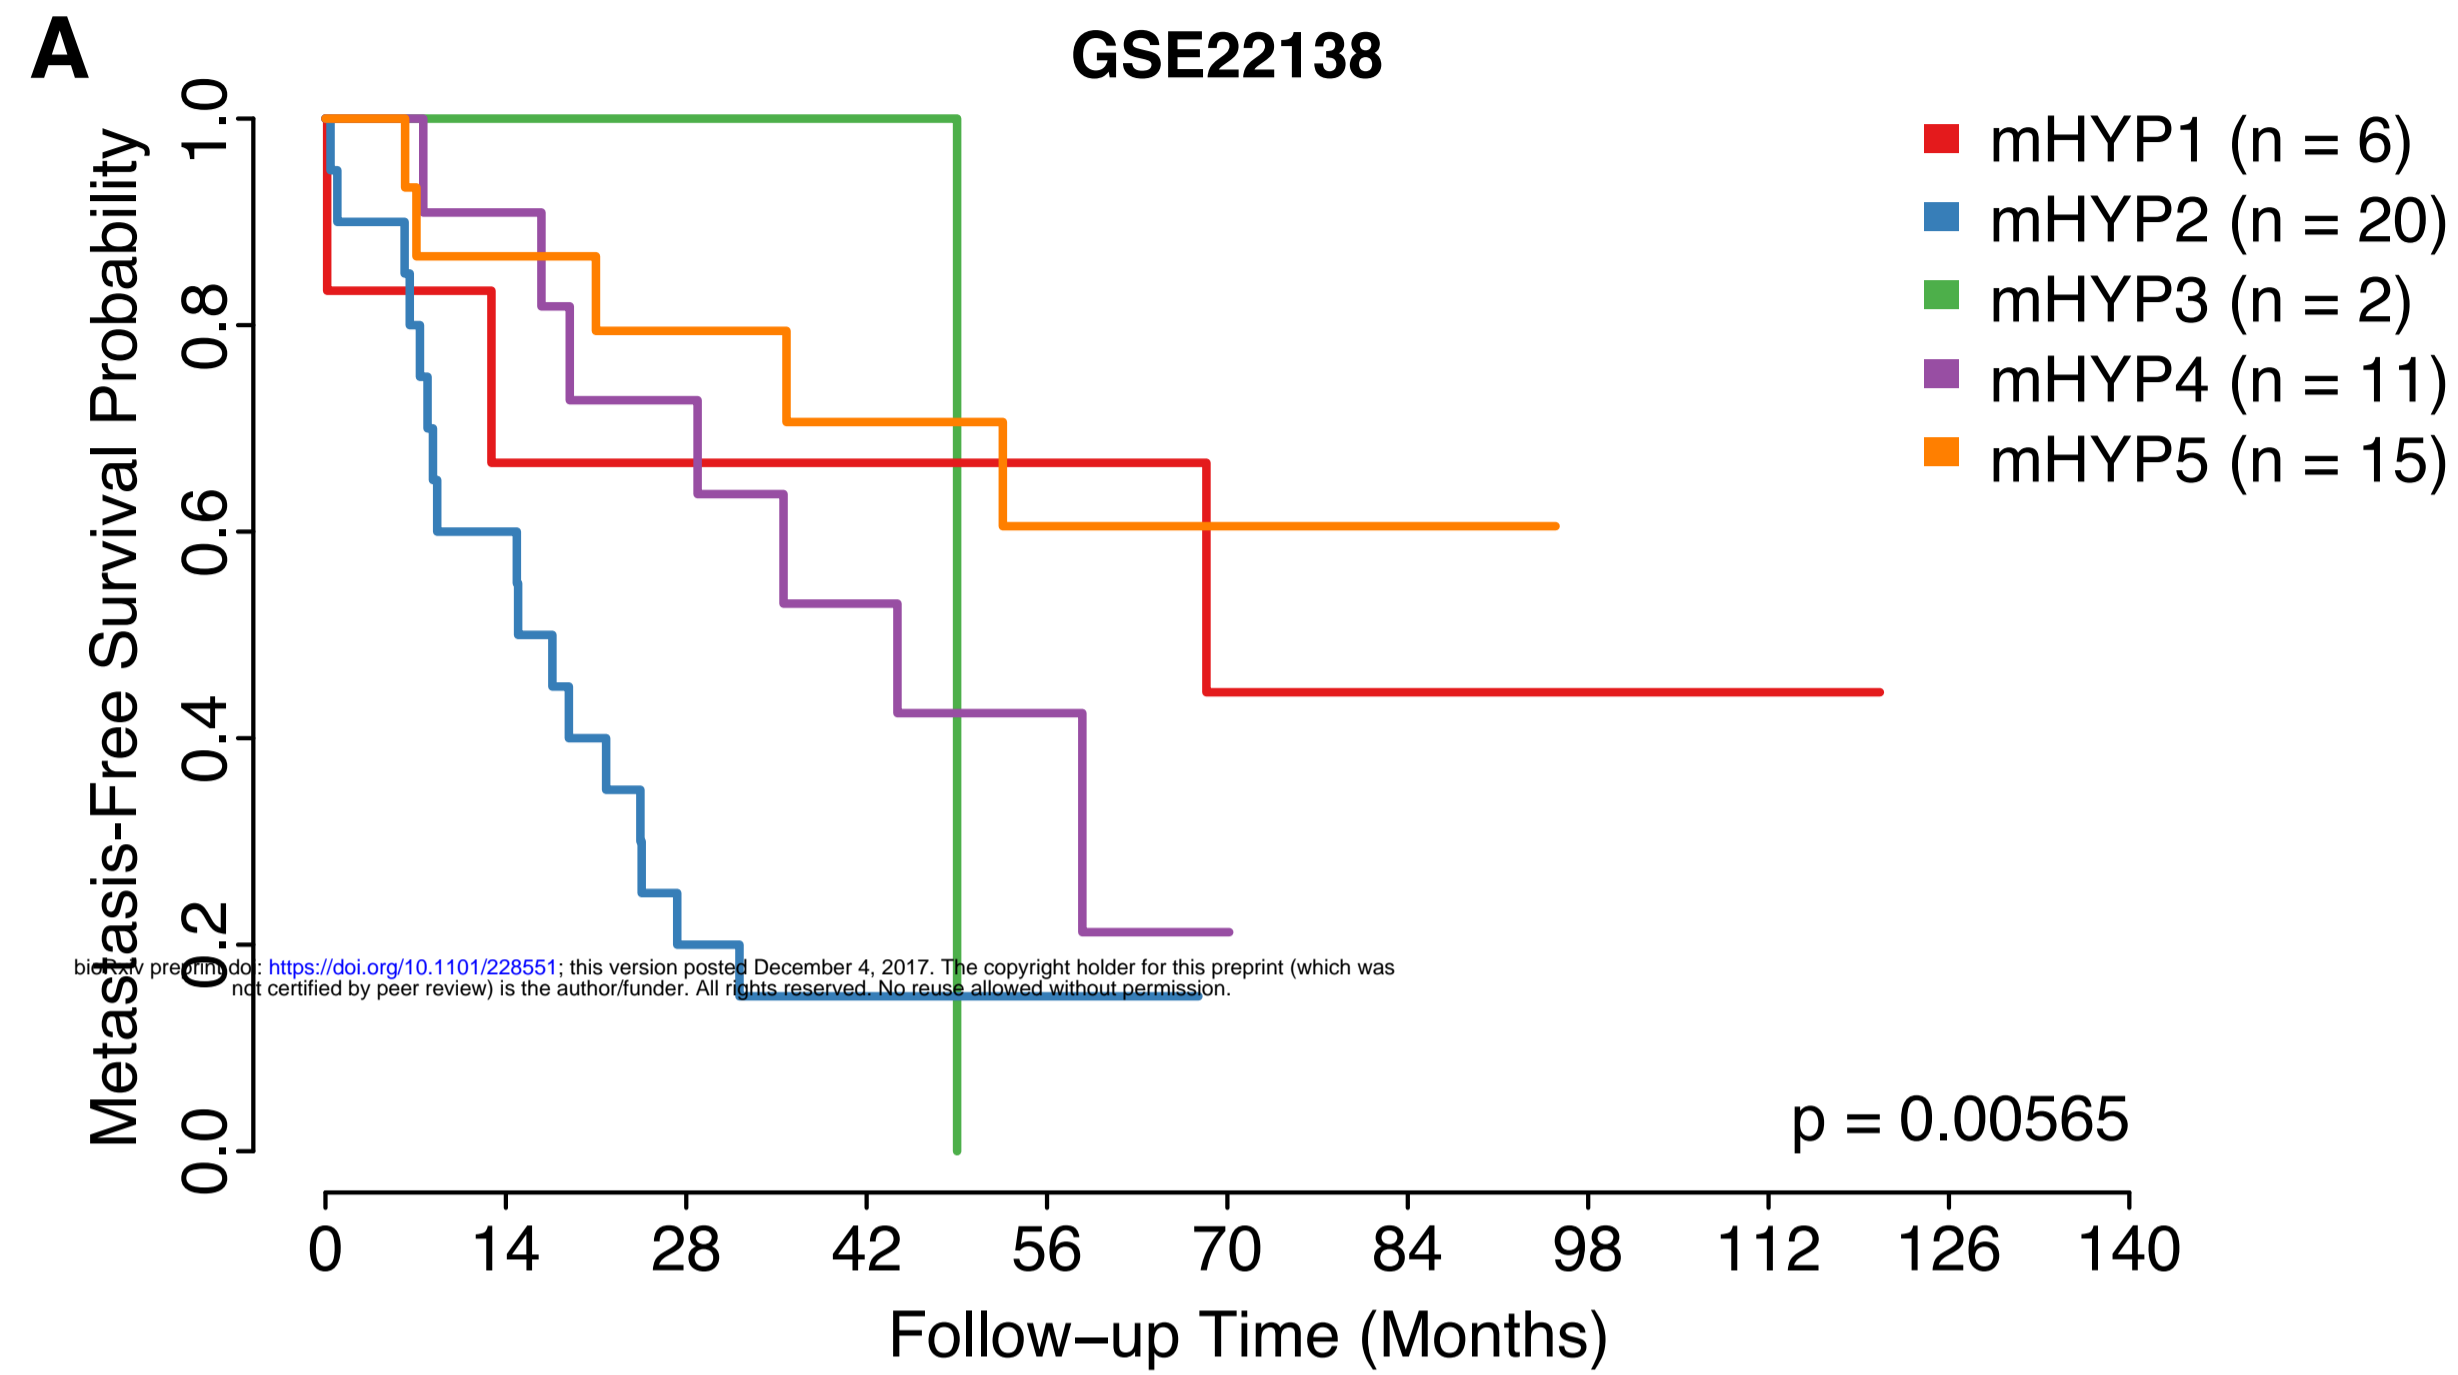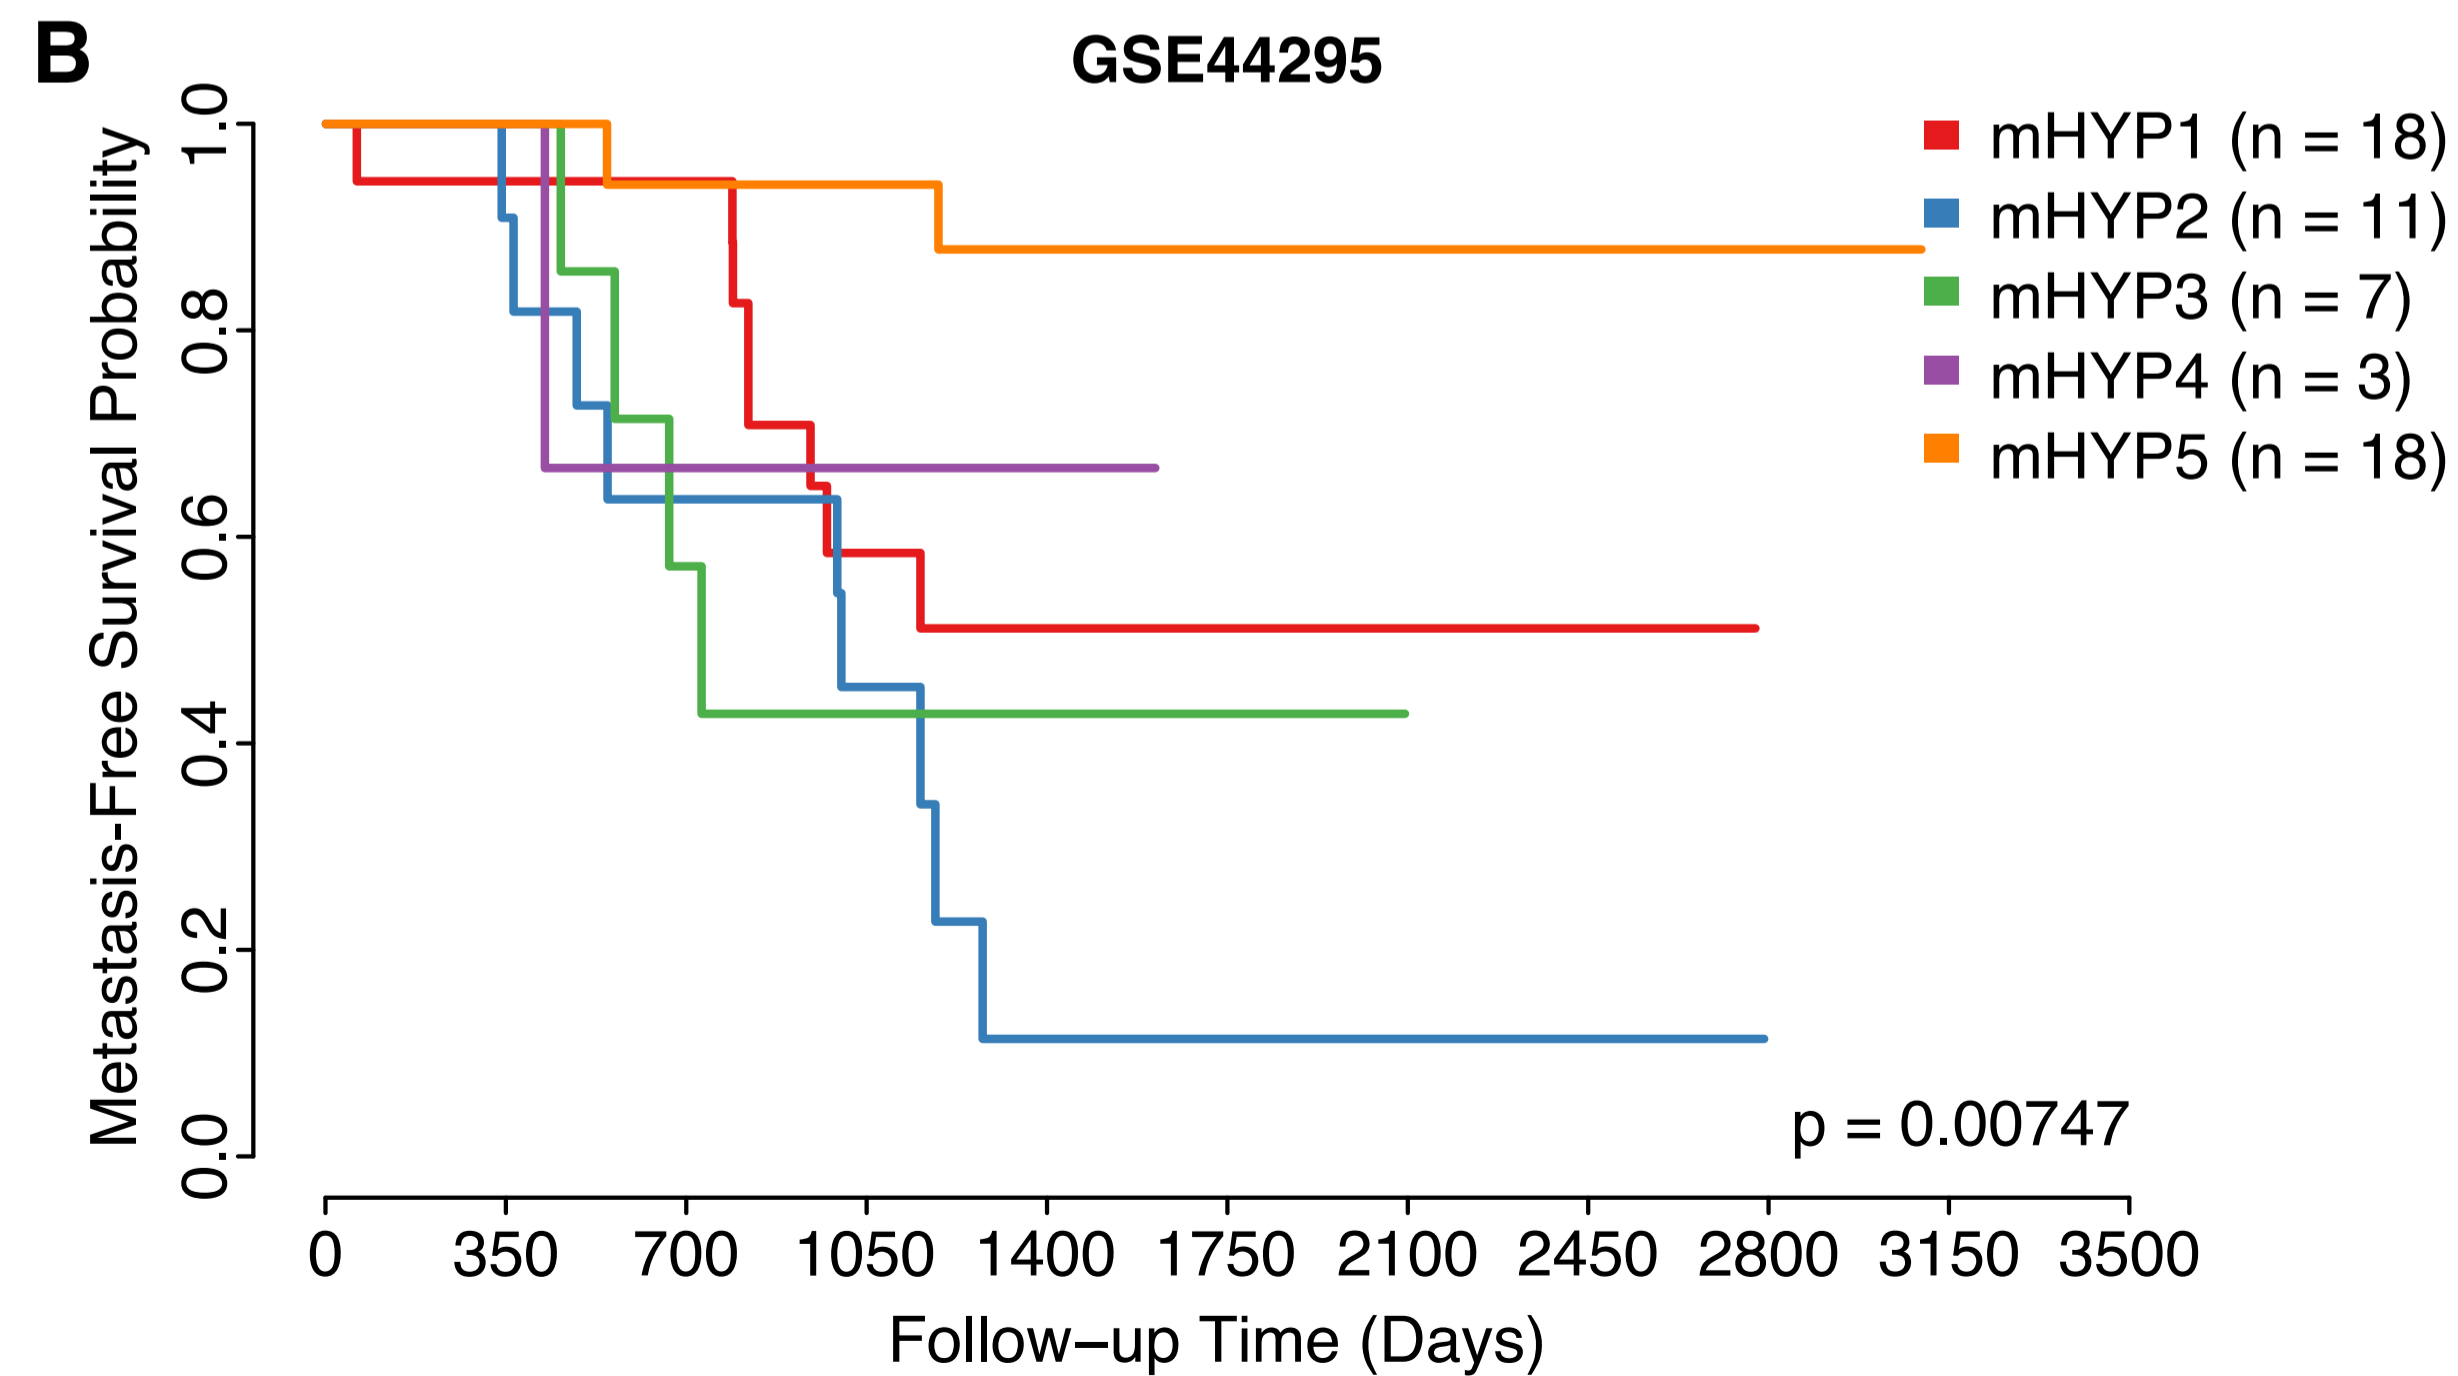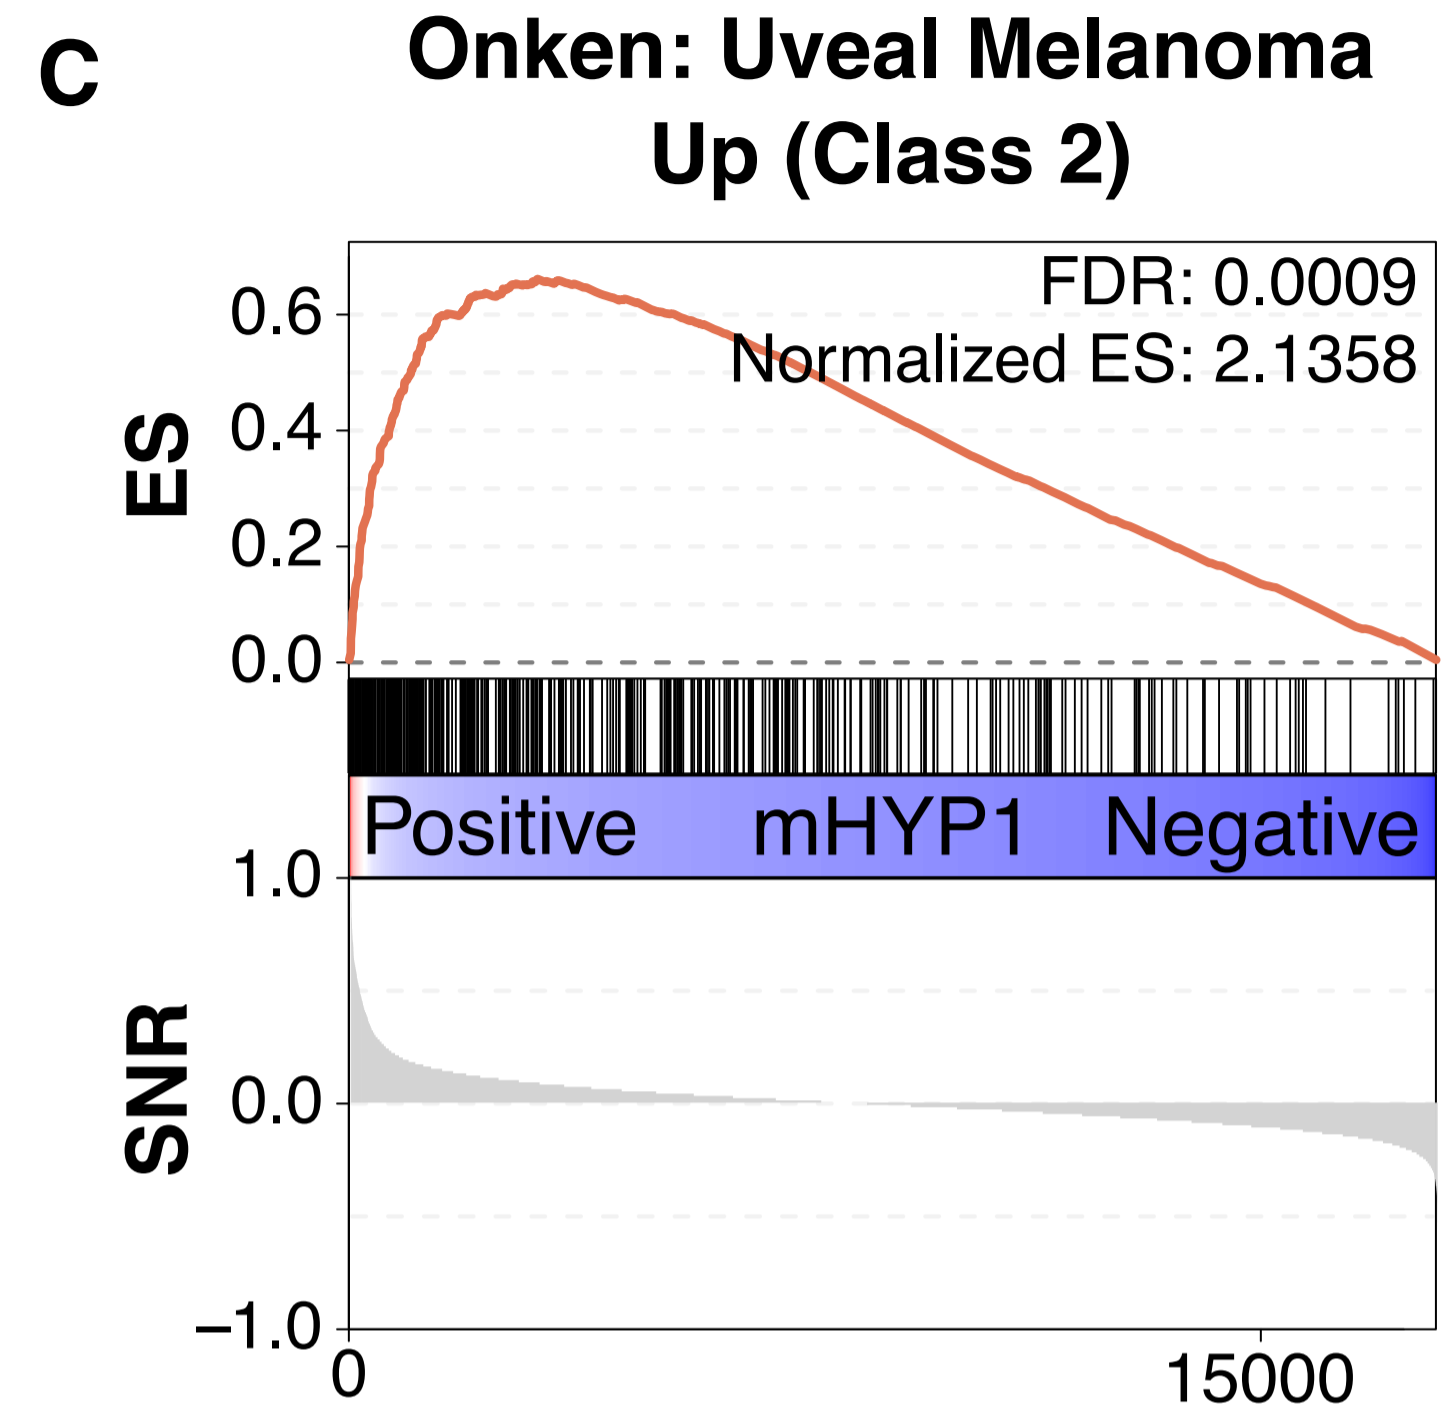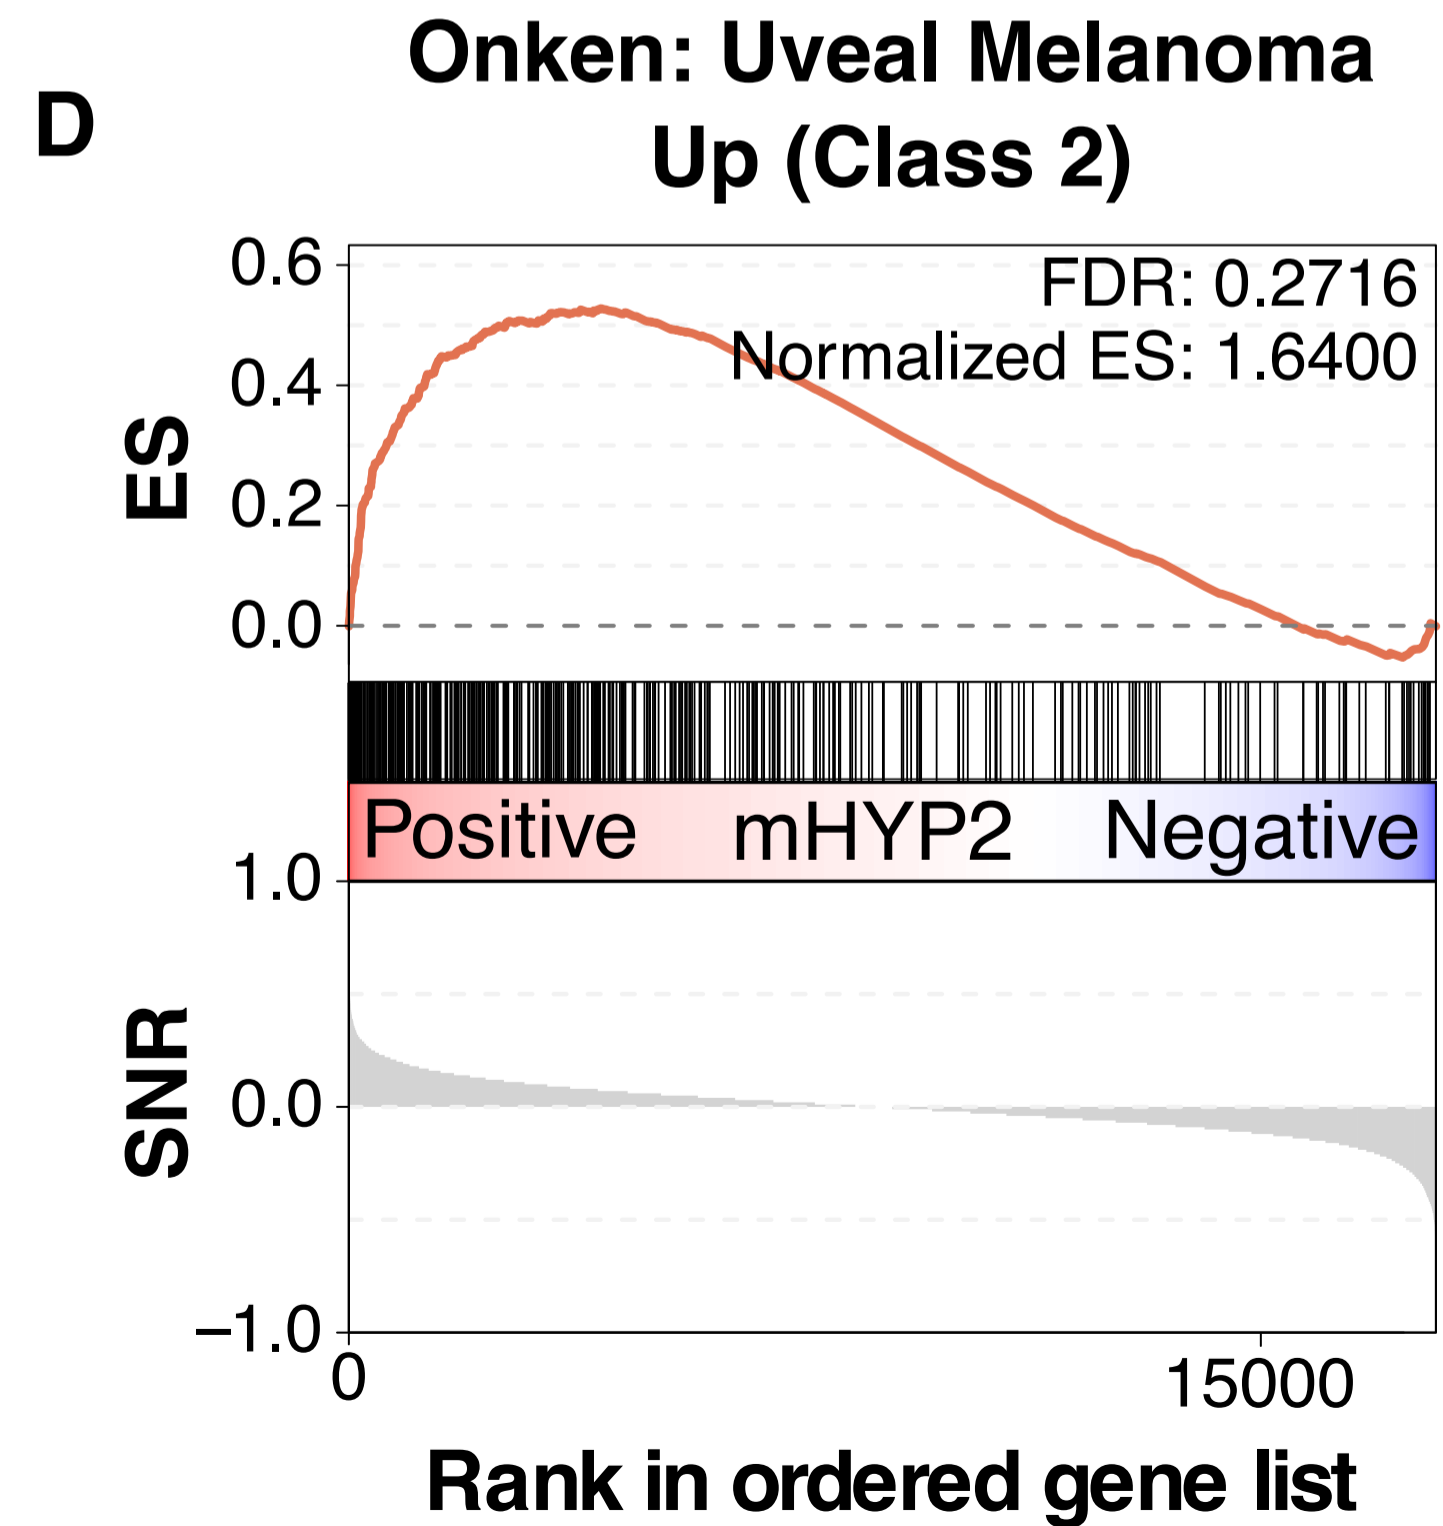

Source: http://biorxiv.org/content/10.1101/228551v1.full.pdf
